# Supplementary material for: Effects of digital devices and online learning on computer vision syndrome in students during the COVID-19 era: an online questionnaire study
Source: PubMed Central journal article supplement (PMC9184992; doi:10.1136/bmjpo-2022-001429), 2022-06-09
Supplement: bmjpo-2022-001429.draft_revisions.pdf [file bmjpo-2022-001429.draft_revisions.pdf]

# BMJ Paediatrics Open

BMJ Paediatrics Open is committed to open peer review. As part of this commitment we make the peer review history of every article we publish publicly available.

When an article is published we post the peer reviewers' comments and the authors' responses online. We also post the versions of the paper that were used during peer review. These are the versions that the peer review comments apply to.

The versions of the paper that follow are the versions that were submitted during the peer review process. They are not the versions of record or the final published versions. They should not be cited or distributed as the published version of this manuscript.

BMJ Paediatrics Open is an open access journal and the full, final, typeset and author-corrected version of record of the manuscript is available on our site with no access controls, subscription charges or pay-per-view fees (<http://bmjpaedsopen.bmj.com>).

If you have any questions on BMJ Paediatrics Open's open peer review process please email [info.bmjpo@bmj.com](mailto:info.bmjpo@bmj.com)

# BMJ Paediatrics Open

## Effects of digital devices and online learning on computer vision syndrome in students during the COVID-19 era

|                               |                                                                                                                                                                                                                                                                                                                                                                                                                                                                                                                                                                                                                                                                                             |
|-------------------------------|---------------------------------------------------------------------------------------------------------------------------------------------------------------------------------------------------------------------------------------------------------------------------------------------------------------------------------------------------------------------------------------------------------------------------------------------------------------------------------------------------------------------------------------------------------------------------------------------------------------------------------------------------------------------------------------------|
| Journal:                      | <i>BMJ Paediatrics Open</i>                                                                                                                                                                                                                                                                                                                                                                                                                                                                                                                                                                                                                                                                 |
| Manuscript ID                 | bmjpo-2022-001429                                                                                                                                                                                                                                                                                                                                                                                                                                                                                                                                                                                                                                                                           |
| Article Type:                 | Original research                                                                                                                                                                                                                                                                                                                                                                                                                                                                                                                                                                                                                                                                           |
| Date Submitted by the Author: | 27-Jan-2022                                                                                                                                                                                                                                                                                                                                                                                                                                                                                                                                                                                                                                                                                 |
| Complete List of Authors:     | Seresirikachorn, Kasem; Thammasat University Sirindhorn International Institute of Technology<br>Thiamthat, Warakorn; Rajavithi Hospital, Department of Ophthalmology, College of Medicine, Rangsit University<br>Sriyuttagrai, Wararee; Rajavithi Hospital, Department of Ophthalmology, College of Medicine, Rangsit University<br>Soonthornworasiri, Ngamphol; Mahidol University, Department of Tropical Hygiene<br>Singhanetr, Panisa; Mettapracharak Hospital, Department of Ophthalmology<br>Yudtanahiran, Narata; Anglo Singapore International School<br>Theeramunkong, Thanaruk; Thammasat University Sirindhorn International Institute of Technology; Royal Society of Thailand |
| Keywords:                     | COVID-19, Adolescent Health, Information Technology, Ophthalmology, Epidemiology                                                                                                                                                                                                                                                                                                                                                                                                                                                                                                                                                                                                            |
|                               |                                                                                                                                                                                                                                                                                                                                                                                                                                                                                                                                                                                                                                                                                             |

SCHOLARONE™  
Manuscripts

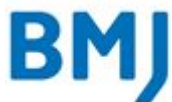

I, the Submitting Author has the right to grant and does grant on behalf of all authors of the Work (as defined in the below author licence), an exclusive licence and/or a non-exclusive licence for contributions from authors who are: i) UK Crown employees; ii) where BMJ has agreed a CC-BY licence shall apply, and/or iii) in accordance with the terms applicable for US Federal Government officers or employees acting as part of their official duties; on a worldwide, perpetual, irrevocable, royalty-free basis to BMJ Publishing Group Ltd ("BMJ") its licensees and where the relevant Journal is co-owned by BMJ to the co-owners of the Journal, to publish the Work in this journal and any other BMJ products and to exploit all rights, as set out in our [licence](#).

The Submitting Author accepts and understands that any supply made under these terms is made by BMJ to the Submitting Author unless you are acting as an employee on behalf of your employer or a postgraduate student of an affiliated institution which is paying any applicable article publishing charge ("APC") for Open Access articles. Where the Submitting Author wishes to make the Work available on an Open Access basis (and intends to pay the relevant APC), the terms of reuse of such Open Access shall be governed by a Creative Commons licence – details of these licences and which [Creative Commons](#) licence will apply to this Work are set out in our licence referred to above.

Other than as permitted in any relevant BMJ Author's Self Archiving Policies, I confirm this Work has not been accepted for publication elsewhere, is not being considered for publication elsewhere and does not duplicate material already published. I confirm all authors consent to publication of this Work and authorise the granting of this licence.

1  
2  
3  
4 1 Effects of digital devices and online learning on computer vision  
5 2 syndrome in students during the COVID-19 era  
6

7 3 *Kasem Seresirikachorn, MD*<sup>1</sup>

8 4 *Warakorn Thiamthat, MD*<sup>2</sup>

9 5 *Wararee Sriyuttagrai, MD*<sup>2</sup>

10 6 *Ngamphol Soonthornworasiri, PhD*<sup>3</sup>

11 7 *Panisa Singhanetr, MD*<sup>4</sup>

12 8 *Narata Yudtanahiran*<sup>5</sup>

13 9 *Thanaruk Theeramunkong, PhD*<sup>1,6</sup>

14 10  
15 11  
16 12  
17 13  
18 14  
19 15  
20 16  
21 17  
22 18  
23 19  
24 20  
25 21  
26 22  
27 23  
28 24  
29 25  
30 26  
31 27  
32 28  
33 29  
34 30  
35 31  
36 32  
37 33  
38 34  
39 35  
40 36  
41 37  
42 38  
43 39  
44 40  
45 41  
46 42  
47 43  
48 44  
49 45  
50 46  
51 47  
52 48  
53 49  
54 50  
55 51  
56 52  
57 53  
58 54  
59 55  
60 56

<sup>1</sup> Sirindhorn International Institute of Technology, Thammasat University, Pathumthani, Thailand.

<sup>2</sup> Department of Ophthalmology, College of Medicine, Rangsit University, Rajavithi Hospital, Bangkok, Thailand.

<sup>3</sup> Department of Tropical Hygiene, Faculty of Tropical Medicine, Mahidol University, Bangkok, Thailand.

<sup>4</sup> Department of Ophthalmology, Mettapracharak Hospital, Nakhon Pathom, Thailand.

<sup>5</sup> Anglo Singapore International School, Bangkok, Thailand

<sup>6</sup> The Royal Society of Thailand, Bangkok, Thailand.

Running title: Effects of digital devices and online learning on computer vision syndrome in students during the COVID-19 era

None of the authors have any conflict of interest to disclose

Correspondence: Thanaruk Theeramunkong PhD,  
Sirindhorn International Institute of Technology, Thammasat University,  
131 Moo5, Tiwanont Road,  
Bangkadi, Muang  
Pathumthani 12000, Thailand.  
Tel: 66 2-501-3505 ext 6018  
Fax: 66 2-501-3505 ext 6014  
Email: [thanaruk@siit.tu.ac.th](mailto:thanaruk@siit.tu.ac.th)

# 1      1      **Effects of digital devices and online learning on computer vision syndrome in** 2      2      **students during the COVID-19 era**

## 3      3      **Abstract (274 words)**

4      4      **Purpose :** Computer vision syndrome (CVS) is a group of eye and vision-related problems  
5      5      that result from prolonged digital device use. This study aims to assess the prevalence and  
6      6      risk factors of CVS among students during lockdown from the COVID-19 pandemic.

7      7      **Methods:** A cross-sectional, online, questionnaire-based study done among high school  
8      8      students in Thailand.

9      9      **Results:** A total of 2,476 students were included in this study, with mean age of  $15.52 \pm 1.66$   
10     10     years. The number of hours of digital device use per day ( $10.53 \pm 2.99$ ) increased during the  
11     11     COVID-19 pandemic compared to before the pandemic ( $6.13 \pm 2.8$ ). The mean number of  
12     12     hours of online learning was  $7.03 \pm 2.06$  hours per day. CVS was found in 70.1% of students  
13     13     with severity correlating with number of hours of online learning, and total number of hours  
14     14     of digital device usage ( $P < 0.001$ ). In contrast, age was inversely correlated with the severity  
15     15     of CVS ( $P < 0.001$ ). Multivariate analysis revealed significant risk factors of CVS including, age  
16     16      $\leq 15$  years (adjusted odds ratio (AOR)=2.17), overall digital device usage  $> 6$  hours per day  
17     17     (AOR=1.91), online learning  $> 5$  hours per day (AOR=4.99), multiple digital device usage  
18     18     (AOR=2.15), refractive errors (AOR=2.89), presence of back pain (AOR=2.06), and presence  
19     19     of neck pain (AOR=2.36).

20     20     **Conclusions:** The number of hours of digital device usage increased during lockdown. Over  
21     21     70% of children have CVS. Multiple risk factors including hours of digital device usage, hours  
22     22     of online learning, ergonomics, and refractive error should be adjusted to decreased the risk  
23     23     of CVS. Online learning will remain, along with CVS after this pandemic. We hope our study  
24     24     could be taken into account in remodeling our education system accordingly.

25     25     **Keywords:** Coronavirus disease (COVID-19), computer vision syndrome (CVS), digital eye  
26     26     strain, severe acute respiratory syndrome coronavirus 2 (SARS-CoV-2)

## 1 Key Messages

### 2 What is known about the subject ?

- 3 • Computer vision syndrome is a group of vision-related problems caused by prolonged  
4 use of digital devices.
- 5 • Learning has shifted from in schools to online during the COVID-19 pandemic.

### 6 What this study adds ?

- 7 • Digital device use has increased 4 hours per day during the COVID-19 pandemic with  
8 average online learning of  $7.03 \pm 2.06$  hours per day.
- 9 • Computer vision syndrome was found in 70.1% of students.
- 10 • Risk factors of CVS include, digital device usage > 6 hours/day, multiple digital device  
11 usage, refractive errors, and presence of back and neck pain.

## 13 1. Background

14 In 2019, there was a report from Wuhan Municipal Health Commission about a  
15 cluster of pneumonia in Wuhan, China. (1-3) What started as an outbreak in China is now a  
16 global crisis. On March 11, 2020, WHO announced that COVID-19 can be classified as a  
17 pandemic. (4) Suppression aims to slow down epidemic growth by reducing the number of  
18 cases and human to human transmission with social distancing and closure of schools and  
19 universities. (5, 6) UNESCO reported 1.37 billion students from over 130 countries affected  
20 by these interventions. For Thailand, UNESCO reported the total duration of school closure  
21 of 42 weeks. (7)

22 Many schools shifted from classroom-based learning to online learning in order to  
23 continue with education. A learning system that is based on teaching with the help of  
24 electronic sources, or e-learning is a suitable option for all levels of education. Therefore,  
25 the benefits of digital devices cannot be denied. (8) Easily accessible learning systems also  
26 has it's downside. Up to 54% of parents of children aged 5 to 15 years reported up to 5  
27 additional hours online on average.(9) Moderate use of screens (4 hours/day) was  
28 associated with lower psychological well-being including, less curiosity, lower self-control,  
29 distractibility, and inability to finish tasks. (10)

30 Rapid advancement in technology has lead digital devices to become a big part of  
31 our daily lives, some more than others. Prolonged screen time can produce physical

1  
2  
3 1 discomfort known as digital eye strain (DES), or computer vision syndrome (CVS), which may  
4  
5 2 be expressed through various symptoms such as, eyestrain, headache, blurred vision, and  
6  
7 3 dry eye symptoms.(11) This study aims to assess the prevalence and risk factors of computer  
8  
9 4 vision syndrome among high school students in Bangkok during lockdown from the COVID-  
10  
11 5 19 pandemic.

## 12 13 6 14 15 7 **2. Materials and Methods**

16  
17  
18 8 This cross-sectional, online, questionnaire-based study was approved by the  
19  
20 9 institutional review boards of Rajavithi Hospital, Thailand, and was conducted in accordance  
21  
22 10 with the Declaration of Helsinki. The online questionnaire was sent to high school students  
23  
24 11 from grade 4 to grade 12 electronically. Before answering the questionnaire, all participants  
25  
26 12 were informed about the purpose, method, and confidentiality of data on the cover letter of  
27  
28 13 the questionnaire. All participants have to sign and accept the informed consent before  
29  
30 14 continuing with the survey. Data was collected between August 16, 2021 and August 31,  
31  
32 15 2021 (15 days), during school closures in accordance with the COVID-19 lockdown policy.

### 33 34 16 Online questionnaire

35  
36 17 The questionnaire consisted of 4 parts including, demographic data and electronic  
37  
38 18 device usage before the pandemic, online learning behaviors, Computer Vision Syndrome  
39  
40 19 Questionnaire (CVS-Q), and a poster providing students with information on the proper use  
41  
42 20 of electronic devices. (Supplementary 1)

43  
44 21 The CVS-Q was developed by Segui et al. (12) This questionnaire is comprised of 16  
45  
46 22 eye symptoms. High school students are required to report the frequency and intensity of  
47  
48 23 each eye symptom. For each symptom, frequency score is multiplied by intensity score and  
49  
50 24 adding all of the scores for each symptom together. For the person to be considered having  
51  
52 25 computer vision syndrome, he or she must have a total score of greater than or equal to six.  
53  
54 26 The severity was divided into mild, moderate, and severe, with scores 6-12, 13-18, and 19 or  
55  
56 27 over respectively.

### 57 58 28 Statistical Analysis

59  
60

1 All the data from the electronic survey was analyzed with SPSS 16.0 for Windows (SPSS  
2 Inc., Chicago, IL, USA). Descriptive statistics were used for categorical data. Continuous data  
3 was reported using mean, median, and standard deviation (SD). Paired-T test was used to  
4 compare the number of hours of digital device used during the COVID pandemic compared  
5 to before the pandemic. One-way ANOVA was used to compare hours of online learning, total  
6 hours of digital device usage, age of students, and severity of CVS. Risk factors associated with  
7 CVS were analyzed by univariate and multivariate logistic regression to identify independent  
8 risk factors of CVS by calculating the odds ratio (OR) and their corresponding 95% confidence  
9 interval (CI). A P-value < 0.05 was considered statistically significant.

### 11 3. Results

#### 12 Baseline Characteristics

13 A total of 2,476 students completed the online survey. Demographic data and  
14 electronic device usage before the pandemic is shown in Table 1. The mean age was  $15.52 \pm$   
15  $1.66$  years with female predominance (64.9%). The majority of students were in grades 10-  
16 12 (68%). Around 40% of the students use glasses or contact lenses to correct for their  
17 refractive errors. Mobile phones were the most used digital device before the COVID-19  
18 pandemic at 54.2%. A quarter of students spend around 5-6 hours of screen time before the  
19 lockdown.

#### 20 Digital Device Usage During the COVID-19 pandemic

21 The average number of hours spent per day using digital devices before the pandemic  
22 was  $6.13 \pm 2.8$ , which increased to an average of  $10.53 \pm 2.99$  during lockdown ( $P < 0.001$ ).  
23 More than half of the students use digital devices for 9-12 hours/day (mean =  $7.03 \pm 2.06$   
24 hours/day). Forty percent of the students use multiple devices when learning online, with  
25 mobile phones being the most used device. Most students do their online studying in a fan  
26 environment. Over 80% of students use some sort of protective equipment including, blue-  
27 coated glasses, or protective films on their digital devices. Symptoms of back pain and neck  
28 pain were present in around 75.9% and 68.1% of students during lockdown, respectively.  
29 (Table 2)



## 1 Computer Vision Syndrome Questionnaire

2 The median score of CVS-Q was 11 (range 0-64). Among all the students who took the  
3 questionnaire, 70.1% have CVS. Increasing CVS severity was correlated with the number of  
4 hours of online learning and total hours of digital device usage ( $P<0.001$ ). In contrast, the age  
5 of students is inversely correlated with the severity of CVS ( $P<0.001$ ). (Figure 1)

6 The most common symptoms from CVS-Q were, headaches ( $n=1921$ , 77.58%), burning  
7 ( $n=1791$ , 72.33%) and eye pain ( $n=1767$ , 71.37%), respectively. In terms of severity,  
8 headaches were the most severe symptom ( $n=392$ , 15.83%) followed by worsening of  
9 eyesight ( $n=266$ , 10.74%), and pain ( $n=256$ , 10.34%). (Figure 2)

## 10 Risk Factors

11 Univariate analysis revealed multiple risk factors associated with CVS including, female  
12 gender ( $P \leq 0.001$ ), device usage without additional protection (blue-coated glasses, blue-  
13 coated film, or both) ( $P=0.006$ ). Students who do their online studying with fans have higher  
14 risk of developing CVS, in comparison with students who study in an air-conditioned  
15 environment ( $P<0.001$ ). Students who prefer using laptop computers have the greatest risk  
16 of developing CVS (OR=2.36, 95%CI: 1.75-3.19,  $P<0.001$ ). (Table 3)

17 Multivariate analysis showed that significant risk factors of CVS were, age  $\leq 15$  years  
18 (AOR=2.17, 95%CI: 1.36-3.45,  $P=0.01$ ), digital device usage  $> 6$  hours/day (AOR=1.91, 95%CI:  
19 1.13-3.23,  $P=0.016$ ), online learning  $> 5$  hours/day (AOR=4.99, 95%CI: 3.08-8.12,  $P<0.001$ ),  
20 multiple digital device usage for online learning (AOR=2.15, 95%CI: 1.04-4.43,  $P=0.038$ ),  
21 refractive errors (AOR=2.89, 95%CI: 1.83-4.54,  $P<0.001$ ), presence of back pain (AOR=2.06,  
22 95%CI: 1.32-3.22,  $P=0.001$ ), and presence of neck pain (AOR=2.36, 95%CI: 1.89-3.70,  
23  $P<0.001$ ). Myopia and emmetropia were independent risk factors of CVS (AOR=2.11, 95%CI:  
24 1.24-3.32 and AOR=2.09, 95%CI: 2.14-3.47 respectively,  $P<0.001$ ).

## 27 **Discussion**

1  
2  
3 1 During the COVID-19 pandemic, the lockdown strategy was used to control the spread  
4 of the disease so schools were closed and online learning replaced the normal classroom  
5 2 environment. Digital device usage during this period increased over 4 hours per day, with the  
6 3 average of online learning at 7 hours per day. The prevalence of CVS in Thai students was  
7 4 70.1%. CVS severity correlated with the number of hours for digital device usage and the  
8 5 number hours of online learning, while the age of student was inversely correlated CVS  
9 6 severity. The most common symptoms of CVS were, headaches (77.58%), burning (72.33%),  
10 7 and eye pain (71.37%), respectively. Multiple digital device usage during online learning,  
11 8 refractive error, the presence of neck and back pain, are also independent risk factors for CVS.  
12 9

13 10 Each country has adopted the use of digital devices differently, whether for education,  
14 11 work, or leisure. Before the COVID-19 era, the prevalence of CVS among university students,  
15 12 adults, and office workers was between 60-80%. A study found that the prevalence of CVS  
16 13 was higher among engineering students compared to medical students. (13) Eyestrain was  
17 14 found in 18% of teenage students at the end of the day after working on digital devices. (14)

18 15 Increased online learning was reported in all levels of education. (15, 16) Students  
19 16 previously used digital devices as homework aids and for reading textbooks. Since school  
20 17 closures, digital devices were used for online classes as well, adding to the number of hours  
21 18 of screen time per day. The increased number of hours spent on digital devices were mostly  
22 19 for educational purposes.(17) During virtual learning of the COVID-19 pandemic, 50% of  
23 20 students in India had CVS, while 77% of students in China reported having at least one  
24 21 symptom of CVS. (17-19)

25 22 Among those with CVS, the severity was significantly correlated with the number of  
26 23 hours of screen time and age. Use of electronic devices over 5 hours was found to be  
27 24 associated with symptoms of CVS. (20) The use of mobile touch screen devices was related to  
28 25 the development of musculoskeletal symptoms. (21)The most common symptom of CVS was  
29 26 headache, in line with many published results. (19, 20, 22)

30 27 Students under 15 were twice more likely to have CVS than those over 15 years, with  
31 28 higher severity in younger students. Prevalence of CVS was lower in older aged Spanish  
32 29 university students than the younger group. (22) In contrast, China found that CVS was  
33 30 independently associated with older age.(18) These difference may be attributed to  
34 60

1  
2  
3 1 differences in the mean age group of students who have varied use of digital devices. Number  
4  
5 2 of hours of digital device usage varied across grades. (23) Another possible explanation for  
6  
7 3 different correlations with age may be the differences in age groups. Younger students might  
8  
9 4 have problems answering some parts of the questionnaire. A study found that children and  
10  
11 5 adolescents aged 6-17 years were unable to report symptoms of dry eye correctly. (24)

12  
13 6 Multiple digital device usage is another independent risk factor for the development  
14  
15 7 of CVS. Each type of device has its own viewing distance. Reading and writing distance is  
16  
17 8 usually 30-40 cm from the eyes. Lesser eyestrain was found when the computer monitor is  
18  
19 9 50-70 cm from the eyes. (25) As for mobile phones and tablets, which have smaller screens  
20  
21 10 than computers, are usually held closer at about 20-30 cm from the eyes. (26) Half of the  
22  
23 11 students in this study reported their reading distance between 40-80 cm, which is the  
24  
25 12 appropriate distance for computers. Only 30% and 38.9% of students use laptop and  
26  
27 13 desktop computers, respectively. About half of the students use multiple devices. When  
28  
29 14 alternating between devices, students might not adjust viewing distance accordingly,  
30  
31 15 leading to CVS. Laptop computers, tablets, and smartphones, are typically held in downward  
32  
33 16 gaze. Increased corneal exposure from higher gaze angle results in increased tear  
34  
35 17 evaporation. Variations in gaze position when alternating between devices lead to CVS. (27)

36  
37 18 Like viewing distance, different types of digital devices require different posturing.  
38  
39 19 Improper ergonomics lead to neck and back pain. Neck pain and back pain are independent  
40  
41 20 risk factors which correlate with earlier reports. (20, 28, 29) A study found that pattern of  
42  
43 21 smartphone or tablet usage in bouts of one hour or more was a risk for musculoskeletal  
44  
45 22 symptoms, rather than total duration of use in number of hours per day. (21) Some students  
46  
47 23 have reported lying on the bed while studying. (14)

48  
49 24 Having refractive error adds to the risk of developing CVS, particularly myopia. Similar  
50  
51 25 results from China found that self-reported myopic students who did and did not wear glasses  
52  
53 26 had higher risk of CVS compared to children who were not myopic. (18) Children with myopia  
54  
55 27 could possibly have residual near-work induced transient myopia from impaired sympathetic  
56  
57 28 function, eventually leading to permanent myopic progression. (30) Long hours of online  
58  
59 29 studying might lead to myopic progression causing children to wear under-corrected lenses.  
60  
30 Residual refractive errors added with continued near-work studying can lead to CVS.

1  
2  
3 1 Myopic and hyperopic students in our study were those who reported wearing myopic  
4  
5 2 or hyperopic corrective lenses for their refractive errors. Those classified as emmetropic  
6  
7 3 (28.8%) were those who did not use corrective lenses because our questionnaire asked  
8  
9 4 whether students wore glasses or contact lenses for short- or long-sightedness, not whether  
10  
11 5 they have refractive errors. Students with uncorrected refractive errors could be hidden in  
12  
13 6 this group, which may be the reason why emmetropia was a significant risk factor for  
14  
15 7 developing CVS. Patients with uncorrected refractive errors were at a higher risk than those  
16  
17 8 with corrected refractive errors and those without refractive errors.

18  
19 9 This study provides comprehensive data on CVS during the COVID-19 pandemic from  
20  
21 10 high school students using a validated questionnaire. Not only students, but also parents,  
22  
23 11 teachers, and schools could benefit from this study in terms of developing appropriate  
24  
25 12 guidelines for online learning. Learning schedules should be adjusted to have appropriate  
26  
27 13 durations and breaks. The overall hour of digital device usage should be under 6 hours/day  
28  
29 14 and online learning should be limited to 5 hours/day, especially in younger students. This  
30  
31 15 study emphasizes the need for regular eye examinations for students especially those with  
32  
33 16 refractive errors, which should be fully corrected. Proper ergonomics and learning  
34  
35 17 environment is also important. Students should adjust posturing and viewing distance  
36  
37 18 according to the digital device used.

38  
39 19 The main limitation of our study is that it is self-reported, which is subjective and some  
40  
41 20 parameters such as refractive errors were not evaluated by standard methods. Second,  
42  
43 21 students in this study were students in Bangkok, which does not represent students in  
44  
45 22 Thailand. Each city in Thailand has been affected differently by the COVID pandemic, and each  
46  
47 23 school has their own protocol of teaching. Lastly, we did not have students perform the CVS-Q  
48  
49 24 before the pandemic, therefore we do not have data for comparison of CVS before and during  
50  
51 25 lockdown.

## 52 53 27 **Conclusion**

54  
55  
56 28 During the pandemic, students spend an increasing number of hours on digital  
57  
58 29 devices. Over 70% of students have CVS, with headache being the most frequent symptom.  
59  
60 30 The number of hours on digital devices, the number of hours of online learning, refractive

1 error, multiple digital device usage, presence of back pain, presence of neck pain, and younger  
2 age are contributory factors of developing CVS.

3 Online learning has grown over the years since before the COVID-19 pandemic, but  
4 has expanded exponentially during times of social distancing. We believe that even after this  
5 pandemic, online learning will remain, along with CVS. Our study points out factors associated  
6 with CVS, which we hope could be taken into consideration in remodeling our education  
7 system accordingly.

### 8 **Acknowledgments**

9

10 We would like to acknowledge Miss Benyapa Dechanupat, Mister Ahiphu Ruamthanthong,  
11 Miss Warisara Wattanasiripong, and Miss Alisha Kewkacha who helped distribute this  
12 survey.

### 13 **Authors' contributions**

14 Conceptualization: KS, TT; Data collection: KS, WS, NY; Methodology: KS, WT, NS, PS, TT;  
15 Statistical analysis: KS, NS, TT ; Writing-original draft: KS, WT, NS, PS, NY, TT; Writing-  
16 review&editing: KS, WT, WS, NS, PS, NY, TT

### 17 **Funding statement**

18 This research received no specific grant from any funding agency in the public, commercial or  
19 not-for-profit sectors

### 20 **A competing interests statement**

21 Not applicable, there are no competing interest

### 22 **Patient and public involvement**

23 Patient and/or the public were not involved in the design, or conduct, or reporting, or  
24 dissemination of this research

### 25 **Patient consent form**

26 Not applicable

27

28

## 1 **Ethics approval**

2 This study has been approved by the Ethics Committee of Rajavithi Hospital approved the  
3 protocol (Number 64237)

## 4 **Data availability statement**

5 The dataset used and/or analyzed during the current study are available from the  
6 corresponding author on reasonable request

## 7 **Reference**

- 8 1. Liu YC, Kuo RL, Shih SR. COVID-19: The first documented coronavirus pandemic in  
9 history. *Biomedical journal*. 2020;43(4):328-33.
- 10 2. Huang C, Wang Y, Li X, Ren L, Zhao J, Hu Y, et al. Clinical features of patients infected  
11 with 2019 novel coronavirus in Wuhan, China. *Lancet (London, England)*.  
12 2020;395(10223):497-506.
- 13 3. Xiao X, Newman C, Buesching CD, Macdonald DW, Zhou Z-M. Animal sales from  
14 Wuhan wet markets immediately prior to the COVID-19 pandemic. *Scientific reports*.  
15 2021;11(1):11898.
- 16 4. World Health Organization. WHO Director-General's opening remarks at the media  
17 briefing on COVID-19-11 March 2020. Available at: <https://www.who.int/director-general/speeches/detail/who-director-general-s-opening-remarks-at-the-media-briefing-on-covid-19--11-march-2020>. Accessed December 29, 2021.
- 18 5. Ferguson N, Laydon D, Nedjati-Gilani G, Imai N, Ainslie K, Baguelin M, et al. Report 9:  
19 Impact of non-pharmaceutical interventions (NPIs) to reduce COVID-19 mortality and  
20 healthcare demand2020.

- 1  
2  
3 1 6. Eubank S, Eckstrand I, Lewis B, Venkatramanan S, Marathe M, Barrett CL.  
4  
5  
6 2 Commentary on Ferguson, et al., "Impact of Non-pharmaceutical Interventions (NPIs) to  
7  
8 3 Reduce COVID-19 Mortality and Healthcare Demand". *Bulletin of mathematical biology*.  
9  
10 4 2020;82(4):52.  
11  
12  
13 5 7. United Nations Educational, Scientific and Cultural Organization Institute for statistics  
14  
15 6 : School closures and regional policies to mitigate learning loss due to COVID-19: a focus on  
16  
17 7 the Asia-Pacific. Montreal, Quebec, Canada 2021.  
18  
19  
20 8 8. Mick D, Fournier S. Paradoxes of Technology: Consumer Cognizance, Emotions, and  
21  
22 9 Coping Strategies. *Journal of Consumer Research*. 1998;25(2):123-43.  
23  
24  
25 10 9. The Economic Times. COVID-19 Impact : Screen time up by 100% for children.  
26  
27 11 Available at: [https://economictimes.indiatimes.com/industry/services/education/covid-19-](https://economictimes.indiatimes.com/industry/services/education/covid-19-impact-screen-time-up-by-100-for-children/articleshow/76383951.cms?from=mdr)  
28  
29 12 [impact-screen-time-up-by-100-for-children/articleshow/76383951.cms?from=mdr](https://economictimes.indiatimes.com/industry/services/education/covid-19-impact-screen-time-up-by-100-for-children/articleshow/76383951.cms?from=mdr).  
30  
31 13 Accessed December 29, 2021.  
32  
33  
34 14 10. Twenge JM, Campbell WK. Associations between screen time and lower  
35  
36 15 psychological well-being among children and adolescents: Evidence from a population-  
37  
38 16 based study. *Preventive Medicine Reports*. 2018;12:271-83.  
39  
40  
41  
42 17 11. Daum KM, Clore KA, Simms SS, Vesely JW, Wilczek DD, Spittle BM, et al. Productivity  
43  
44 18 associated with visual status of computer users. *Optometry (St Louis, Mo)*. 2004;75(1):33-  
45  
46 19 47.  
47  
48  
49 20 12. Seguí Mdel M, Cabrero-García J, Crespo A, Verdú J, Ronda E. A reliable and valid  
50  
51 21 questionnaire was developed to measure computer vision syndrome at the workplace.  
52  
53 22 *Journal of clinical epidemiology*. 2015;68(6):662-73.  
54  
55  
56  
57  
58  
59  
60

- 1  
2  
3 1 13. Logaraj M, Madhupriya V, Hegde S. Computer vision syndrome and associated  
4 factors among medical and engineering students in chennai. *Annals of medical and health*  
5  
6 2 sciences research. 2014;4(2):179-85.  
7  
8 3  
9  
10 4 14. Ichhpujani P, Singh RB, Foulsham W, Thakur S, Lamba AS. Visual implications of  
11 digital device usage in school children: a cross-sectional study. *BMC ophthalmology*.  
12  
13 5 2019;19(1):76.  
14  
15 6  
16  
17 7 15. Parajuli BR, Koirala S, Bajracharya A. Computer vision syndrome: a rising problem  
18 during COVID-19 period amongst students and online workers. *Journal of Patan Academy of*  
19  
20 8 Health Sciences. 2021;8(2):6-9.  
21  
22 9  
23  
24 10 16. Wang L, Wei X, Deng Y. Computer Vision Syndrome During SARS-CoV-2 Outbreak in  
25 University Students: A Comparison Between Online Courses and Classroom Lectures.  
26  
27 11 *Frontiers in public health*. 2021;9:696036.  
28  
29 12  
30  
31 13 17. Ganne P, Najeeb S, Chaitanya G, Sharma A, Krishnappa NC. Digital Eye Strain  
32 Epidemic amid COVID-19 Pandemic - A Cross-sectional Survey. *Ophthalmic epidemiology*.  
33  
34 14 2021;28(4):285-92.  
35  
36 15  
37  
38 16 18. Li R, Ying B, Qian Y, Chen D, Li X, Zhu H, et al. Prevalence of Self-Reported Symptoms  
39 of Computer Vision Syndrome and Associated Risk Factors among School Students in China  
40 during the COVID-19 Pandemic. *Ophthalmic epidemiology*. 2021:1-11.  
41  
42 17  
43  
44 18 19. Mohan A, Sen P, Shah C, Jain E, Jain S. Prevalence and risk factor assessment of  
45 digital eye strain among children using online e-learning during the COVID-19 pandemic:  
46  
47 19 *Digital eye strain among kids (DESK study-1)*. *Indian journal of ophthalmology*.  
48  
49 20 2021;69(1):140-4.  
50  
51  
52  
53  
54  
55  
56  
57  
58  
59  
60



- 1  
2  
3 1 20. Al Tawil L, Aldokhayel S, Zeitouni L, Qadoumi T, Hussein S, Ahamed SS. Prevalence of  
4  
5 2 self-reported computer vision syndrome symptoms and its associated factors among  
6  
7 3 university students. *European journal of ophthalmology*. 2020;30(1):189-95.  
8  
9  
10 4 21. Toh SH, Coenen P, Howie EK, Smith AJ, Mukherjee S, Mackey DA, et al. A prospective  
11  
12 5 longitudinal study of mobile touch screen device use and musculoskeletal symptoms and  
13  
14 6 visual health in adolescents. *Applied ergonomics*. 2020;85:103028.  
15  
16  
17 7 22. Cantó-Sancho N, Sánchez-Brau M, Ivorra-Soler B, Seguí-Crespo M. Computer vision  
18  
19 8 syndrome prevalence according to individual and video display terminal exposure  
20  
21 9 characteristics in Spanish university students. *International journal of clinical practice*.  
22  
23 10 2021;75(3):e13681.  
24  
25  
26 11 23. Straker L, Harris C, Joosten J, Howie EK. Mobile technology dominates school  
27  
28 12 children's IT use in an advantaged school community and is associated with musculoskeletal  
29  
30 13 and visual symptoms. *Ergonomics*. 2018;61(5):658-69.  
31  
32  
33 14 24. Hu L, Yan Z, Ye T, Lu F, Xu P, Chen H. Differences in children and adolescents' ability  
34  
35 15 of reporting two CVS-related visual problems. *Ergonomics*. 2013;56(10):1546-57.  
36  
37  
38 16 25. Rempel D, Willms K, Anshel J, Jaschinski W, Sheedy J. The effects of visual display  
39  
40 17 distance on eye accommodation, head posture, and vision and neck symptoms. *Human*  
41  
42 18 *factors*. 2007;49(5):830-8.  
43  
44  
45 19 26. Long J, Cheung R, Duong S, Paynter R, Asper L. Viewing distance and eyestrain  
46  
47 20 symptoms with prolonged viewing of smartphones. *Clinical & experimental optometry*.  
48  
49 21 2017;100(2):133-7.  
50  
51  
52 22 27. Rosenfield M. Computer vision syndrome: a review of ocular causes and potential  
53  
54 23 treatments. *Ophthalmic & physiological optics : the journal of the British College of*  
55  
56 24 *Ophthalmic Opticians (Optometrists)*. 2011;31(5):502-15.  
57  
58  
59  
60

- 1  
2  
3 1 28. Teo C, Giffard P, Johnston V, Treleaven J. Computer vision symptoms in people with  
4  
5  
6 2 and without neck pain. *Applied ergonomics*. 2019;80:50-6.  
7  
8 3 29. Sen A, Richardson S. A study of computer-related upper limb discomfort and  
9  
10 4 computer vision syndrome. *Journal of human ergology*. 2007;36(2):45-50.  
11  
12  
13 5 30. Vasudevan B, Ciuffreda KJ, Gilmartin B. Sympathetic Inhibition of Accommodation  
14  
15 6 after Sustained Nearwork in Subjects with Myopia and Emmetropia. *Investigative*  
16  
17 7 *Ophthalmology & Visual Science*. 2009;50(1):114-20.  
18  
19  
20  
21 8  
22  
23  
24 9  
25  
26  
27 10  
28  
29  
30 11  
31  
32  
33 12  
34  
35  
36 13  
37  
38  
39 14  
40  
41  
42 15  
43  
44  
45 16  
46  
47  
48  
49 17  
50  
51  
52 18  
53  
54  
55 19  
56  
57  
58 20  
59  
60

**Table 1** Demographic characteristics of participants and usage of electronic device before pandemic (N=2,476)

| Demographic characteristics                         | N (%)                      |
|-----------------------------------------------------|----------------------------|
| Mean age (years) ± SD                               | 15.52 ± 1.66 (range 10-19) |
| Female                                              | 1,606 (64.9%)              |
| <b>Grade</b>                                        |                            |
| Grade 4-6                                           | 11 (0.4%)                  |
| Grade 7-9                                           | 781 (31.6%)                |
| Grade 10-12                                         | 1684 (68%)                 |
| <b>Refractive status</b>                            |                            |
| Emmetropia                                          | 1180 (47.7%)               |
| Myopia                                              | 1055 (42.6%)               |
| Hyperopia                                           | 241 (9.7%)                 |
| <b>Glasses and Contact lens use</b>                 |                            |
| None                                                | 1180 (47.7%)               |
| Glasses for myopia                                  | 784 (31.7%)                |
| Glasses for hyperopia                               | 186 (7.5%)                 |
| CL for myopia                                       | 151 (6.1%)                 |
| CL for hyperopia                                    | 47 (1.9%)                  |
| Glasses and CL for myopia                           | 120 (4.8%)                 |
| Glasses and CL for hyperopia                        | 8 (0.3%)                   |
| <b>Duration of digital device usage (pre-covid)</b> |                            |
| ≤ 2h                                                | 201 (8.1%)                 |
| 3-4 h                                               | 596 (24.1%)                |
| 5-6 h                                               | 648 (26.2%)                |
| 7-8 h                                               | 492 (19.9%)                |
| 9-10 h                                              | 401 (16.2%)                |
| 11-12 h                                             | 49 (1.9%)                  |
| > 12 h                                              | 89 (3.6%)                  |
| <b>Most digital device usage (pre-covid)</b>        |                            |
| Mobile phone                                        | 1341 (54.2%)               |
| Tablet                                              | 454 (18.3%)                |
| Computer desktop                                    | 436 (17.6%)                |
| Computer Laptop                                     | 216 (8.7%)                 |
| Television                                          | 29 (1.2%)                  |
| <b>Frequency of eye check-up</b>                    |                            |
| None                                                | 1054 (42.6%)               |
| Once every 2 years                                  | 504 (20.4%)                |
| Once a year                                         | 715 (28.9%)                |
| Twice a year                                        | 203 (8.2%)                 |

1 **Table 2** The usage of electronic device on online learning during covid-19 lockdown (N=2,476)

| Demographic characteristics                                       | N (%)        |
|-------------------------------------------------------------------|--------------|
| <b>Total hours of digital device</b>                              |              |
| ≤ 4 h                                                             | 84 (3.4%)    |
| 5-8 h                                                             | 465 (18.8%)  |
| 9-12 h                                                            | 1311 (52.9%) |
| 13-16 h                                                           | 571 (23.1%)  |
| > 16 h                                                            | 45 (1.8%)    |
| <b>Total hours of online learning</b>                             |              |
| ≤ 2h                                                              | 67 (2.7%)    |
| 3-4 h                                                             | 271 (11%)    |
| 5-6 h                                                             | 502 (20.3%)  |
| 7-8 h                                                             | 1109 (44.8%) |
| 9-10 h                                                            | 480 (19.4%)  |
| > 10 h                                                            | 47 (1.8%)    |
| <b>Device used for online learning</b>                            |              |
| Single device                                                     | 1486 (60%)   |
| Multiple device                                                   | 990 (40%)    |
| Mobile phone                                                      | 1174 (47.4%) |
| Tablet                                                            | 1095 (44.2%) |
| Computer desktop                                                  | 965 (39%)    |
| Computer Laptop                                                   | 691 (27.9%)  |
| Television                                                        | 27 (1.1%)    |
| <b>Environment</b>                                                |              |
| Fan                                                               | 1272 (51.4%) |
| Air-condition                                                     | 1203 (48.6%) |
| <b>Protective instrument</b>                                      |              |
| None                                                              | 413 (16.7%)  |
| Blue-coated glasses                                               | 1172 (47.3%) |
| Blue coated film on digital devices                               | 680 (27.5%)  |
| Both blue-coated glasses and film on digital device               | 211 (8.5%)   |
| <b>Frequency of eye rest</b>                                      |              |
| Never                                                             | 371 (15%)    |
| Every 15 minutes                                                  | 596 (24.1%)  |
| Every 30 minutes                                                  | 431 (17.4%)  |
| Every 45 minutes                                                  | 304 (12.3%)  |
| Every 1 hours                                                     | 427 (17.2%)  |
| Every ≥ 1 hour                                                    | 347 (14%)    |
| <b>Distance of digital device from eye during online learning</b> |              |
| < 40 cm                                                           | 943 (38.1%)  |
| 40-80 cm                                                          | 1260 (50.9%) |
| > 80 cm                                                           | 273 (11%)    |
| <b>Back pain</b>                                                  | 1880 (75.9%) |
| <b>Neck pain</b>                                                  | 1687 (68.1%) |
| <b>Activity when rest</b>                                         |              |
| Close your eye                                                    | 1144 (46.2%) |
| Sleep                                                             | 1230 (49.7%) |
| Look out                                                          | 822 (33.2%)  |
| Play games                                                        | 568 (22.9%)  |
| Artificial tear                                                   | 271 (10.9%)  |

1 **Table 3** The multivariate logistic regression the associated risk factor and CVS

| Factor                           | Univariate analysis |            |         | Multivariate analysis |                  |                  |
|----------------------------------|---------------------|------------|---------|-----------------------|------------------|------------------|
|                                  | Crude OR            | 95%CI      | P-value | Adjusted OR           | 95%CI            | P-value          |
| Age ≤ 15                         | 2.34                | 1.63-3.36  | <0.001  | <b>2.17</b>           | <b>1.36-3.45</b> | <b>0.010</b>     |
| Female                           | 1.73                | 1.34-2.23  | <0.001  | 1.26                  | 0.90-1.75        | 0.178            |
| Overall digital usage > 6 hr     | 7.41                | 5.52-9.96  | <0.001  | <b>1.91</b>           | <b>1.13-3.23</b> | <b>0.016</b>     |
| Online learning > 5 hr           | 7.99                | 6.07-10.53 | <0.001  | <b>4.99</b>           | <b>3.08-8.12</b> | <b>&lt;0.001</b> |
| Refractive error                 | 1.35                | 1.02-1.79  | 0.035   | <b>2.89</b>           | <b>1.83-4.54</b> | <b>&lt;0.001</b> |
| <b>Refractive error</b>          |                     |            |         |                       |                  |                  |
| Myopia                           | 3.21                | 2.31-4.44  | <0.001  | <b>2.11</b>           | <b>1.24-3.32</b> | <b>&lt;0.001</b> |
| Emmetropia                       | 3.19                | 2.21-4.60  | <0.001  | <b>2.09</b>           | <b>2.14-3.47</b> | <b>&lt;0.001</b> |
| Hyperopia                        | Ref                 |            |         | <b>Ref</b>            |                  |                  |
| Fan                              | 2.55                | 1.86-3.48  | <0.001  | 1.20                  | 0.81-1.81        | 0.362            |
| Non-Protective device used       | 1.82                | 1.19-2.79  | 0.006   | 1.07                  | 0.66-1.73        | 0.793            |
| <b>Protective device</b>         |                     |            |         |                       |                  |                  |
| Both                             | 4.62                | 2.90-7.38  | <0.001  | 0.66                  | 0.39-1.11        | 0.118            |
| Blue-coated glasses              | 3.36                | 2.52-4.49  | <0.001  | 1.19                  | 0.71-1.99        | 0.508            |
| Blue-coated film                 | Ref                 |            |         | Ref                   |                  |                  |
| Rest over 45 mins                | 2.59                | 2.01-3.34  | <0.001  | 1.02                  | 0.7-1.48         | 0.935            |
| Other digital device used > 2 hr | 2.22                | 1.73-2.85  | <0.001  | 0.89                  | 0.61-1.28        | 0.520            |
| Distance from device < 40 cm     | 2.42                | 1.78-3.30  | <0.001  | 1.07                  | 0.71-1.63        | 0.743            |
| Back pain                        | 2.84                | 2.12-3.80  | <0.001  | <b>2.06</b>           | <b>1.32-3.22</b> | <b>0.001</b>     |
| Neck pain                        | 2.59                | 1.94-3.46  | <0.001  | <b>2.64</b>           | <b>1.89-3.70</b> | <b>&lt;0.001</b> |
| Multiple digital device used     | 3.60                | 2.76-4.70  | <0.001  | <b>2.15</b>           | <b>1.04-4.43</b> | <b>0.038</b>     |
| Non Use Artificial tear          | 0.96                | 0.70-1.30  | 0.77    | 1.34                  | 0.91-1.98        | 0.133            |
| Close eye during online learning | 1.69                | 1.32-2.17  | <0.001  | 1.12                  | 0.80-1.55        | 0.508            |
| Sleep during online learning     | 2.12                | 1.64-2.74  | <0.001  | 1.29                  | 0.93-1.79        | 0.135            |
| Laptop computers preference      | 2.36                | 1.75-3.19  | <0.001  | 0.83                  | 0.48-1.42        | 0.494            |
| Tablet preference                | 2.27                | 1.77-2.92  | <0.001  | 0.86                  | 0.51-1.45        | 0.568            |
| Television screen preference     | 1.49                | 0.49-4.55  | 0.49    | 1.067                 | 0.30-3.75        | 0.920            |
| Computer desktop preference      | 1.37                | 1.07-1.77  | 0.016   | 1.00                  | 0.61-1.66        | 0.987            |
| Mobile phone preference          | 1.34                | 1.03-1.69  | 0.031   | 0.81                  | 0.50-1.31        | 0.395            |

2

3

4

5

6

7

**Figure 1** Incidence and severity of CVS according the mean hour of online learning and the mean hour of digital device

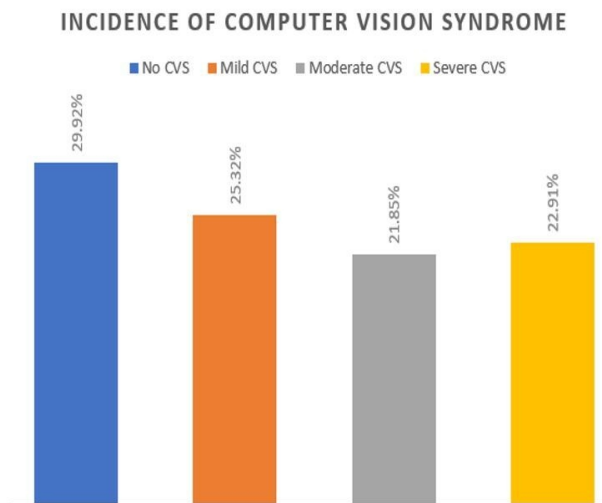

|                                                  | No CVS<br>(n=741) | Mild CVS<br>(n=627) | Moderate CVS<br>(n=541) | Severe CVS<br>(n=567) | P-value |
|--------------------------------------------------|-------------------|---------------------|-------------------------|-----------------------|---------|
| Mean age (yrs) ± SD                              | 15.55 ± 1.11      | 15.35 ± 1.27        | 15.20 ± 1.22            | 15.10 ± 1.14          | < 0.001 |
| The mean hour of online learning (hrs) ± SD      | 6.16 ± 2.26       | 7.23 ± 2.01         | 7.28 ± 1.78             | 7.69 ± 1.74           | < 0.001 |
| The mean hour of total digital device (hrs) ± SD | 9.45 ± 3.38       | 10.77 ± 2.93        | 10.89 ± 2.57            | 11.33 ± 2.54          | < 0.001 |

101x87mm (300 x 300 DPI)

1  
2  
3  
4  
5  
6  
7  
8  
9  
10  
11  
12  
13  
14  
15  
16  
17  
18  
19  
20  
21  
22  
23  
24  
25  
26  
27  
28  
29  
30  
31  
32  
33  
34  
35  
36  
37  
38  
39  
40  
41  
42  
43  
44  
45  
46  
47  
48  
49  
50  
51  
52  
53  
54  
55  
56  
57  
58  
59  
60

**Figure 2** The percentage of frequency and severity of different eye symptoms of CVS in student

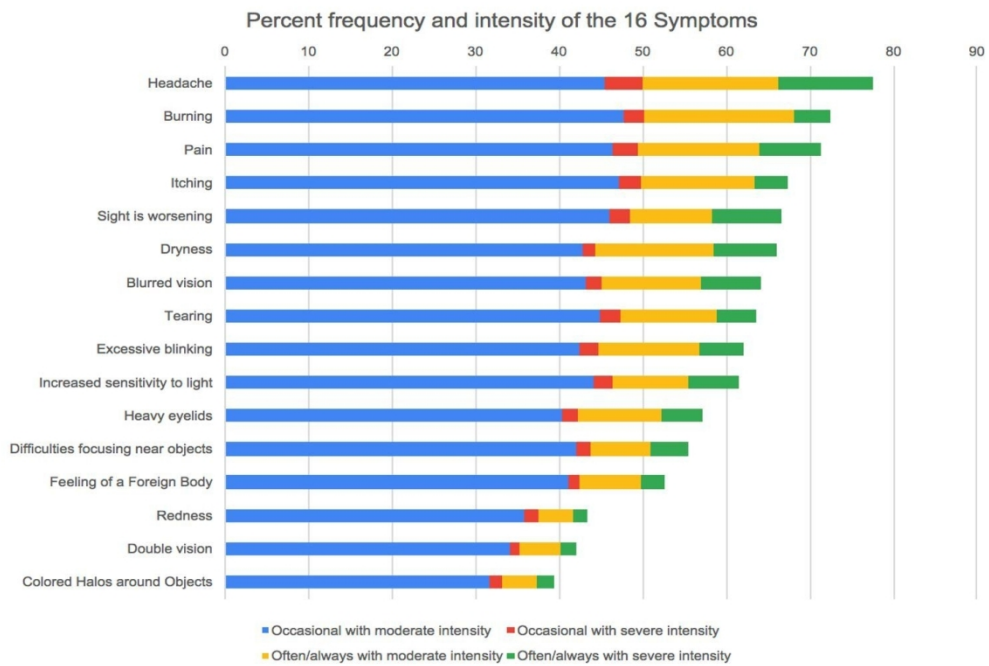

128x91mm (300 x 300 DPI)

## Effects of digital devices and online learning on computer vision syndrome in students during the COVID-19 era

### Survey

The purpose of this survey: This survey aims to gather information from students of different year groups about what visual symptoms they experience and how well they protect their eyes during the period of online learning, since it is compulsory for students to sit in front of their screens for a long period of time. This results of this survey will then be analyzed, conclusion will be drawn and the results will then be incorporated as one of the research findings.

General overview of the survey:

First section of the survey - 8 questions

Second section of the survey - 8 questions

Third section of the survey - 18-36 questions

It will take approximately 2 minutes to fill out the survey!

Please note that the survey will be anonymous. The information will be kept confidential and will only be used for this research.

### **Informed consent**

1. Do you voluntarily agree to complete this survey?
  - I voluntarily agreed to complete this survey

### **Section 1 of the survey: General information**

1. Age  
\_\_\_\_\_
2. Gender
  - Male
  - Female
3. Grade level
  - Grade 1-3/Year 2-4
  - Grade 4-6/Year 5-7
  - Grade 7-9/Year 8-10
  - Grade 10-12/Year 11-13
4. Before the period of online learning, how many hours per day do you spend on average using electronic devices?
  - 0 hour
  - 1 hour
  - 2 hours
  - 3 hours
  - 4 hours
  - 5 hours
  - 6 hours
  - 7 hours



- 1  
2  
3  
4  
5  
6  
7  
8  
9  
10  
11  
12  
13  
14  
15  
16  
17  
18  
19  
20  
21  
22  
23  
24  
25  
26  
27  
28  
29  
30  
31  
32  
33  
34  
35
- 8 hours
  - 9 hours
  - 10 hours
  - 11 hours
  - 12 hours
  - Other.....
5. Before the period of online learning, what electronic devices did you use most often?
- Tablet (iPad)
  - Mobile Phone
  - Computer/Desktop
  - Laptop
  - Television
  - Other
6. Do you wear any of these? (Can tick more than one box)
- Glasses for short-sightedness
  - Glasses for long-sightedness
  - Contact lenses for short-sightedness
  - Contact lenses for long-sightedness
7. How often do you have an eye check-up?
- Never
  - Once every two years
  - Once a year
  - Twice a year
  - Other

## Section 2 of the Survey

- 36  
37  
38  
39  
40  
41  
42  
43  
44  
45  
46  
47  
48  
49  
50  
51  
52  
53  
54  
55  
56  
57  
58  
59  
60
7. What electronic devices do you use for online learning?
- Tablet (iPad)
  - Mobile Phone
  - Computer/Desktop
  - Laptop
  - Television
  - Other
8. How many hours per day do you spent learning online?
- 1 hour
  - 2 hours
  - 3 hours
  - 4 hours
  - 5 hours
  - 6 hours
  - 7 hours
  - 8 hours
  - 9 hours
  - 10 hours
  - 11 hours

- 1  
2  
3  
4  
5  
6  
7  
8  
9  
10  
11  
12  
13  
14  
15  
16  
17  
18  
19  
20  
21  
22  
23  
24  
25  
26  
27  
28  
29  
30  
31  
32  
33  
34  
35  
36  
37  
38  
39  
40  
41  
42  
43  
44  
45  
46  
47  
48  
49  
50  
51  
52  
53  
54  
55  
56  
57  
58  
59  
60
- 12 hours
  - Other.....
9. What is the environment of your room when you learn online? Do you use a fan or an air conditioner?
- Fan
  - Air conditioner
  - Other
10. Do you use any equipment to help protect your eyes?
- Glasses
  - Films for computer/tablets/phone screens
11. How often do you give your eyes a rest during online classes?
- Never
  - Every 15 minutes
  - Every 30 minutes
  - Every 45 minutes
  - Every 1 hour
  - Every 2 hours
  - Other
12. What do you do when you rest your eyes?
- Close your eyes
  - Look out of the window as far as you could
  - Play games on your device
  - Sleep
  - Artificial tear
  - Other
13. Apart from using electronic devices for online learning, how much time do you spend using electronic devices for other activities?
- 1 hour
  - 2 hours
  - 3 hours
  - 4 hours
  - 5 hours
  - 6 hours
  - 7 hours
  - 8 hours
  - 9 hours
  - 10 hours
  - 11 hours
  - 12 hours
  - Other.....
14. How far apart do you position your devices from your eyes?
- 20-40 cm
  - 40-60 cm
  - 60-80 cm
  - 80-100 cm
  - more than 100 cm

**Section 3 of the survey:**

This section will be the computer vision syndrome questionnaire.

The first question will be related to the frequency of the symptom, how often the symptom occurs:

Never = the symptom does not occur at all

Occasionally = Sporadic episodes or once a week

Often or always = 2 or 3 times a week or almost everyday

NOTE: If you have answered "Never" for the first question, you will not be asked about the intensity, but if you answered "Occasionally" or "Often or always", you will be required to answer the question about intensity.

The second question will be related to the intensity of the symptom. You are required to choose between "moderate" or "Intense" for each of the symptoms.

15. When you learn online, do you experience the symptom of eye burning?
  - Never (the symptom does not occur)
  - Occasionally (once a week)
  - Often or always (2 or 3 times a week or almost everyday)
16. What is the intensity of the symptom? (If you answered never, do not answer this question)
  - Moderate
  - Intense
17. When you learn online, do you experience the symptom of eye itching?
  - Never (the symptom does not occur)
  - Occasionally (once a week)
  - Often or always (2 or 3 times a week or almost everyday)
18. What is the intensity of the symptom? (If you answered never, do not answer this question)
  - Moderate
  - Intense
19. When you learn online, have you ever feel like there's foreign body in your eyes?
  - Never (the symptom does not occur)
  - Occasionally (once a week)
  - Often or always (2 or 3 times a week or almost everyday)
20. What is the intensity of the symptom? (If you answered never, do not answer this question)
  - Moderate
  - Intense
21. When you learn online, do you experience the symptom of tearing?
  - Never (the symptom does not occur)
  - Occasionally (once a week)
  - Often or always (2 or 3 times a week or almost everyday)
22. What is the intensity of the symptom? (If you answered never, do not answer this question)
  - Moderate

- 1  
2  
3  
4  
5  
6  
7  
8  
9  
10  
11  
12  
13  
14  
15  
16  
17  
18  
19  
20  
21  
22  
23  
24  
25  
26  
27  
28  
29  
30  
31  
32  
33  
34  
35  
36  
37  
38  
39  
40  
41  
42  
43  
44  
45  
46  
47  
48  
49  
50  
51  
52  
53  
54  
55  
56  
57  
58  
59  
60
- Intense
23. When you learn online, do you experience the symptom of excessive blinking?
- Never (the symptom does not occur)
  - Occasionally (once a week)
  - Often or always (2 or 3 times a week or almost everyday)
24. What is the intensity of the symptom? (If you answered never, do not answer this question)
- Moderate
  - Intense
25. When you learn online, do you experience the symptom of eye redness?
- Never (the symptom does not occur)
  - Occasionally (once a week)
  - Often or always (2 or 3 times a week or almost everyday)
26. What is the intensity of the symptom? (If you answered never, do not answer this question)
- Moderate
  - Intense
27. When you learn online, do you experience the symptom of eye pain?
- Never (the symptom does not occur)
  - Occasionally (once a week)
  - Often or always (2 or 3 times a week or almost everyday)
28. What is the intensity of the symptom? (If you answered never, do not answer this question)
- Moderate
  - Intense
29. When you learn online, do you experience the symptom of heavy eyelids?
- Never (the symptom does not occur)
  - Occasionally (once a week)
  - Often or always (2 or 3 times a week or almost everyday)
30. What is the intensity of the symptom? (If you answered never, do not answer this question)
- Moderate
  - Intense
31. When you learn online, do you experience the symptom of eye dryness?
- Never (the symptom does not occur)
  - Occasionally (once a week)
  - Often or always (2 or 3 times a week or almost everyday)
32. What is the intensity of the symptom? (If you answered never, do not answer this question)
- Moderate
  - Intense
33. When you learn online, do you experience the symptom of blurred vision?
- Never (the symptom does not occur)
  - Occasionally (once a week)
  - Often or always (2 or 3 times a week or almost everyday)
34. What is the intensity of the symptom? (If you answered never, do not answer this question)

- 1  
2  
3  
4  
5  
6  
7  
8  
9  
10  
11  
12  
13  
14  
15  
16  
17  
18  
19  
20  
21  
22  
23  
24  
25  
26  
27  
28  
29  
30  
31  
32  
33  
34  
35  
36  
37  
38  
39  
40  
41  
42  
43  
44  
45  
46  
47  
48  
49  
50  
51  
52  
53  
54  
55  
56  
57  
58  
59  
60
- Moderate
  - Intense
35. When you learn online, do you experience the symptom of double vision?
- Never (the symptom does not occur)
  - Occasionally (once a week)
  - Often or always (2 or 3 times a week or almost everyday)
36. What is the intensity of the symptom? (If you answered never, do not answer this question)
- Moderate
  - Intense
37. When you learn online, how often do you experience difficulties focusing near objects?
- Never (the symptom does not occur)
  - Occasionally (once a week)
  - Often or always (2 or 3 times a week or almost everyday)
38. What is the intensity of the symptom? (If you answered never, do not answer this question)
- Moderate
  - Intense
39. When you learn online, do you experience the symptom of increased sensitivity to light?
- Never (the symptom does not occur)
  - Occasionally (once a week)
  - Often or always (2 or 3 times a week or almost everyday)
40. What is the intensity of the symptom? (If you answered never, do not answer this question)
- Moderate
  - Intense
41. When you learn online, do you experience the symptom of colored halos around objects?
- Never (the symptom does not occur)
  - Occasionally (once a week)
  - Often or always (2 or 3 times a week or almost everyday)
42. What is the intensity of the symptom? (If you answered never, do not answer this question)
- Moderate
  - Intense
43. When you learn online, do you experience the feeling that sight is worsening?
- Never (the symptom does not occur)
  - Occasionally (once a week)
  - Often or always (2 or 3 times a week or almost everyday)
44. What is the intensity of the symptom? (If you answered never, do not answer this question)
- Moderate
  - Intense
45. When you learn online, how often do you have a headache?
- Never (the symptom does not occur)

- 1  
2  
3  
4  
5  
6  
7  
8  
9  
10  
11  
12  
13  
14  
15  
16  
17  
18  
19  
20  
21  
22  
23  
24  
25  
26  
27  
28  
29  
30  
31  
32  
33  
34  
35  
36  
37  
38  
39  
40  
41  
42  
43  
44  
45  
46  
47  
48  
49  
50  
51  
52  
53  
54  
55  
56  
57  
58  
59  
60
- Occasionally (once a week)
  - Often or always (2 or 3 times a week or almost everyday)
46. What is the intensity of the symptom? (If you answered never, do not answer this question)
- Moderate
  - Intense
47. When you learn online, how often do you experience back pain?
- Never (the symptom does not occur)
  - Occasionally (once a week)
  - Often or always (2 or 3 times a week or almost everyday)
48. What is the intensity of the symptom? (If you answered never, do not answer this question)
- Moderate
  - Intense
49. When you learn online, how often do you experience neck pain?
- Never (the symptom does not occur)
  - Occasionally (once a week)
  - Often or always (2 or 3 times a week or almost everyday)
50. What is the intensity of the symptom? (If you answered never, do not answer this question)
- Never (the symptom does not occur)
  - Occasionally (once a week)
  - Often or always (2 or 3 times a week or almost everyday)

Thank you for completing this survey!

# BMJ Paediatrics Open

## Effects of digital devices and online learning on computer vision syndrome in students during the COVID-19 era: an online questionnaire study

|                               |                                                                                                                                                                                                                                                                                                                                                                                                                                                                                                                                                                                                                                                                                                                 |
|-------------------------------|-----------------------------------------------------------------------------------------------------------------------------------------------------------------------------------------------------------------------------------------------------------------------------------------------------------------------------------------------------------------------------------------------------------------------------------------------------------------------------------------------------------------------------------------------------------------------------------------------------------------------------------------------------------------------------------------------------------------|
| Journal:                      | <i>BMJ Paediatrics Open</i>                                                                                                                                                                                                                                                                                                                                                                                                                                                                                                                                                                                                                                                                                     |
| Manuscript ID                 | bmjpo-2022-001429.R1                                                                                                                                                                                                                                                                                                                                                                                                                                                                                                                                                                                                                                                                                            |
| Article Type:                 | Original research                                                                                                                                                                                                                                                                                                                                                                                                                                                                                                                                                                                                                                                                                               |
| Date Submitted by the Author: | 09-Apr-2022                                                                                                                                                                                                                                                                                                                                                                                                                                                                                                                                                                                                                                                                                                     |
| Complete List of Authors:     | Seresirikachorn, Kasem; Thammasat University Sirindhorn International Institute of Technology<br>Thiamthat, Warakorn; Rajavithi Hospital, Department of Ophthalmology, College of Medicine, Rangsit University<br>Sriyuttagrai, Wararee; Rajavithi Hospital, Department of Ophthalmology, College of Medicine, Rangsit University<br>Soonthornworasiri, Ngamphol; Mahidol University, Department of Tropical Hygiene<br>Singhanetr, Panisa; Metta Pracharak Hospital Wat Rai Khing, Department of Ophthalmology<br>Yudtanahiran, Narata; Chulalongkorn University Faculty of Medicine Theeramunkong, Thanaruk; Thammasat University Sirindhorn International Institute of Technology; Royal Society of Thailand |
| Keywords:                     | COVID-19, Adolescent Health, Information Technology, Ophthalmology, Epidemiology                                                                                                                                                                                                                                                                                                                                                                                                                                                                                                                                                                                                                                |
|                               |                                                                                                                                                                                                                                                                                                                                                                                                                                                                                                                                                                                                                                                                                                                 |

SCHOLARONE™  
Manuscripts

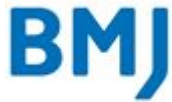

I, the Submitting Author has the right to grant and does grant on behalf of all authors of the Work (as defined in the below author licence), an exclusive licence and/or a non-exclusive licence for contributions from authors who are: i) UK Crown employees; ii) where BMJ has agreed a CC-BY licence shall apply, and/or iii) in accordance with the terms applicable for US Federal Government officers or employees acting as part of their official duties; on a worldwide, perpetual, irrevocable, royalty-free basis to BMJ Publishing Group Ltd ("BMJ") its licensees and where the relevant Journal is co-owned by BMJ to the co-owners of the Journal, to publish the Work in this journal and any other BMJ products and to exploit all rights, as set out in our [licence](#).

The Submitting Author accepts and understands that any supply made under these terms is made by BMJ to the Submitting Author unless you are acting as an employee on behalf of your employer or a postgraduate student of an affiliated institution which is paying any applicable article publishing charge ("APC") for Open Access articles. Where the Submitting Author wishes to make the Work available on an Open Access basis (and intends to pay the relevant APC), the terms of reuse of such Open Access shall be governed by a Creative Commons licence – details of these licences and which [Creative Commons](#) licence will apply to this Work are set out in our licence referred to above.

Other than as permitted in any relevant BMJ Author's Self Archiving Policies, I confirm this Work has not been accepted for publication elsewhere, is not being considered for publication elsewhere and does not duplicate material already published. I confirm all authors consent to publication of this Work and authorise the granting of this licence.



1  
2  
3  
4 1 Effects of digital devices and online learning on computer vision  
5 2 syndrome in students during the COVID-19 era: an online  
6 3 questionnaire study  
7  
8

9 4 *Kasem Seresirikachorn, MD*<sup>1</sup>

10 5 *Warakorn Thiamthat, MD*<sup>2</sup>

11 6 *Wararee Sriyuttagrai, MD*<sup>2</sup>

12 7 *Ngamphol Soonthornworasiri, PhD*<sup>3</sup>

13 8 *Panisa Singhanetr, MD*<sup>4</sup>

14 9 *Narata Yudtanahiran*<sup>5</sup>

15 10 *Thanaruk Theeramunkong, PhD*<sup>1,6</sup>

16 11  
17 12  
18 13  
19 14  
20 15  
21 16  
22 17  
23 18  
24 19  
25 20  
26 21  
27 22  
28 23  
29 24  
30 25  
31 26  
32 27  
33 28  
34 29  
35 30  
36 31  
37 32  
38 33  
39 34  
40 35  
41 36  
42 37  
43 38  
44 39  
45 40  
46 41  
47 42  
48 43  
49 44  
50 45  
51 46  
52 47  
53 48  
54 49  
55 50  
56 51  
57 52  
58 53  
59 54  
60 55

1 Sirindhorn International Institute of Technology, Thammasat University, Pathumthani, Thailand.

2 Department of Ophthalmology, College of Medicine, Rangsit University, Rajavithi Hospital, Bangkok, Thailand.

3 Department of Tropical Hygiene, Faculty of Tropical Medicine, Mahidol University, Bangkok, Thailand.

4 Department of Ophthalmology, Mettapracharak Hospital, Nakhon Pathom, Thailand.

5 Faculty of Medicine, Chulalongkorn University, Bangkok, Thailand.

6 The Royal Society of Thailand, Bangkok, Thailand.

Running title: Effects of digital devices and online learning on computer vision syndrome in students during the COVID-19 era: an online questionnaire study

None of the authors have any conflict of interest to disclose

Correspondence: Thanaruk Theeramunkong PhD,  
Sirindhorn International Institute of Technology, Thammasat University,  
131 Moo5, Tiwanont Road,  
Bangkadi, Muang  
Pathumthani 12000, Thailand.  
Tel: 66 2-501-3505 ext 6018  
Fax: 66 2-501-3505 ext 6014  
Email: [thanaruk@siit.tu.ac.th](mailto:thanaruk@siit.tu.ac.th)

# 1        1    **Effects of digital devices and online learning on computer vision syndrome in** 2        2    **students during the COVID-19 era: an online questionnaire study**

## 3        3    **Abstract (280 words)**

4        4    **Purpose :** Computer vision syndrome (CVS) describes a group of eye and vision-related  
5        5    problems that result from prolonged digital device use. This study aims to assess the  
6        6    prevalence and associated factors of CVS among students during the lockdown resulting  
7        7    from the COVID-19 pandemic.

8        8    **Methods:** A cross-sectional, online, questionnaire-based study performed among high  
9        9    school students in Thailand.

10       10   **Results:** A total of 2,476 students, with mean age of  $15.52 \pm 1.66$  years, were included in  
11       11   this study. The mean number of hours of digital device use per day ( $10.53 \pm 2.99$ ) increased  
12       12   during the COVID-19 pandemic compared to before its advent ( $6.13 \pm 2.8$ ). The mean  
13       13   number of hours of online learning was  $7.03 \pm 2.06$  hours per day during the pandemic. CVS  
14       14   was found in 70.1% of students, and its severity correlated with both the number of hours  
15       15   of online learning and the total number of hours of digital device usage ( $P < 0.001$ ). Multiple  
16       16   logistic regression analysis revealed that the factors associated with CVS included age  $\leq 15$   
17       17   years (adjusted odds ratio (AOR)=2.17), overall digital device usage  $> 6$  hours per day  
18       18   (AOR=1.91), online learning  $> 5$  hours per day (AOR=4.99), multiple digital device usage  
19       19   (AOR=2.15), refractive errors (AOR=2.89), presence of back pain (AOR=2.06), and presence  
20       20   of neck pain (AOR=2.36).

21       21   **Conclusions:** The number of hours of digital device usage increased during lockdown. Over  
22       22   70% of children had CVS, whose associated factors, including hours of digital device usage,  
23       23   hours of online learning, ergonomics, and refractive errors, should be adjusted to decrease  
24       24   the risk of acquiring this condition. Online learning will remain, along with CVS, after this  
25       25   pandemic, and we hope our research will be taken into account in remodeling our education  
26       26   system accordingly.

27  
28       28   **Keywords:** Coronavirus disease (COVID-19), computer vision syndrome (CVS), digital eye  
29       29   strain, severe acute respiratory syndrome coronavirus 2 (SARS-CoV-2)

## 1 Key Messages

### 2 What is known about the subject

- 3 • Computer vision syndrome describes a group of vision-related problems caused by  
4 prolonged use of digital devices.
- 5 • Learning has shifted from being performed in schools to taking place online during the  
6 COVID-19 pandemic.

### 7 What this study adds

- 8 • Digital device use has increased by 4 hours per day, and the mean hours of online  
9 learning was 7 hours per day.
- 10 • Computer vision syndrome was found in 70.1% of students.
- 11 • Factors associated with CVS included digital device usage > 6 hours/day, multiple  
12 digital device usage, refractive errors, and presence of back and neck pain.

## 14 1. Background

15 In 2019, there was a report from Wuhan Municipal Health Commission about a  
16 cluster of cases of pneumonia in Wuhan, China. (1-3) What started as an outbreak in China  
17 is now a global crisis. On March 11, 2020, the WHO announced that COVID-19 could be  
18 classified as a pandemic. (4) Suppression measures aimed at slowing down epidemic growth  
19 by reducing the number of cases and human to human transmission included social  
20 distancing and closure of schools and universities, and (5, 6) UNESCO reported that 1.37  
21 billion students from over 130 countries were affected by these interventions. For Thailand,  
22 the total duration of school closure was 42 weeks. (7)

23 Many schools shifted from classroom-based learning to online schooling in order to  
24 continue teaching. Up to 54% of parents of children aged 5 to 15 years reported as many as  
25 5 additional hours spent online. (8) Moderate use of screens (4 hours/day) was associated  
26 with lower psychological well-being, including less curiosity, lower self-control,  
27 distractibility, and inability to finish tasks. (9)

28 Rapid advancement in technology has led to digital devices becoming a big part of  
29 our daily lives, especially for students, who use digital devices as homework aids, for  
30 reading, and for leisure activities. Approximately 40% of school pupils have been found to  
31 spend less than 2 hours a day or 2-4 hours a day on digital device reading, while 14% spent

1  
2  
3 1 4-6 hours and 3% spent over 6 hours each day using digital devices for reading. (10)  
4  
5 2 Prolonged screen time can produce physical discomfort known as digital eye strain (DES), or  
6  
7 3 computer vision syndrome (CVS). The American Optometric Association (AOA) defined CVS  
8  
9 4 as a group of eye and vision-related problems that result from prolonged usage of digital  
10  
11 5 devices which cause increased stress to near vision. (11) The diagnosis of CVS is subjective,  
12  
13 6 with numerous questionnaires being developed to diagnose this syndrome, including the  
14  
15 7 CVSS17 questionnaire, a 6-item visual fatigue scale by Benedetto, and the Computer Vision  
16  
17 8 Syndrome Questionnaire (CVS-Q) by Segui et al. (12-14) The CVS-Q is a validated  
18  
19 9 questionnaire commonly used in clinical trials to evaluate the visual health of digital device  
20  
21 10 users.

22  
23 11 Before the COVID-19 era, the prevalence of CVS among university students, adults, and  
24  
25 12 office workers was between 60-80%. (15) Eyestrain was found in 18% of teenage students at  
26  
27 13 the end of the day after working on digital devices. (10) A study from Indonesia reported  
28  
29 14 that 87.2% of high school students experienced evaporative dry eye, which is one of the risk  
30  
31 15 factors of CVS. (16) On average, children aged 8-12 years in the United States were found to  
32  
33 16 spend 4-6 hours a day watching or using screens, while teens spent up to 9 hours.(17) In  
34  
35 17 Thailand, 94.84% of secondary school students were found to have at least one symptom of  
36  
37 18 CVS in 2016. Thai children spend approximately 35 hours per week watching screens. (18)

38  
39 19 The prevalence of dry eye symptoms is greater during electronic screen use than when  
40  
41 20 viewing printed materials. (19) Environmental factors such as use of air conditioning and  
42  
43 21 windy environments have been reported to correlate with visual symptoms of dry eye  
44  
45 22 disease, (20) which is a major contributor to CVS. (21) Factors previously reported to be  
46  
47 23 associated with CVS were hours of use, screen distance, screen brightness, room  
48  
49 24 illumination, wearing of contact lenses, and refractive errors. (10, 22) Commonly-reported  
50  
51 25 symptoms relating to CVS are headaches, eyestrain, blurred vision, dry eye symptoms, and  
52  
53 26 pain in the neck and shoulders.

54  
55 27 This study aims to assess the prevalence and associated factors of CVS among school  
56  
57 28 students in Bangkok during lockdown resulting from the COVID-19 pandemic.

58  
59  
60 29

30

## 2. Materials and Methods

This cross-sectional, online, questionnaire-based study was approved by the institutional review boards of Rajavithi Hospital, Thailand, and it was conducted in accordance with the tenets of the Declaration of Helsinki. An online questionnaire was sent to primary and secondary school students (ages 10-19 years) electronically. Before answering the questionnaire, all participants were informed on the cover letter of the questionnaire about the study's purpose, methods and guarantee of anonymity of data. All participants were required to sign and accept an informed consent form before continuing with the survey, in which they answered the questions themselves. Data was collected between August 16, 2021 and August 31, 2021 (15 days), during online schooling in accordance with the COVID-19 lockdown policy.

### Online questionnaire

The questionnaire consisted of 4 parts: demographic data and electronic device usage before the pandemic; online learning behavior; a Computer Vision Syndrome Questionnaire (CVS-Q); and a poster providing students with information on the proper use of electronic devices. (Supplementary 1)

The CVS-Q, which was developed by Segui et al., (14) investigates the presence of 16 eye symptoms. High school students were required to report the frequency and intensity of each eye symptom. For each symptom, the frequency score is multiplied by the intensity score and all of the scores for each symptom are added together. For the person to be considered as having computer vision syndrome, he or she must have a total score of greater than or equal to six. The severity was divided into mild, moderate, and severe, corresponding with scores of 6-12, 13-18, and 19 or over respectively.

### Statistical Analysis

All the data from the electronic survey was analyzed with SPSS 16.0 for Windows (SPSS Inc., Chicago, IL, USA). Frequencies and percentages were used for categorical data. Continuous data were reported using mean, median, and standard deviation (SD) after confirmation of normal distribution of the data. Paired-T test was used to compare the number of hours of digital device use during and prior to the COVID pandemic, while one-way

1  
2  
3 1 ANOVA was utilized to compare hours of online learning, total hours of digital device usage,  
4 and severity of CVS. Risk factors associated with CVS were analyzed by univariate and multiple  
5 2 logistic regression to identify independent risk factors of CVS by calculating the odds ratio  
6 3 (OR) and their corresponding 95% confidence interval (CI). All variables with a  $p$ -value  $< 0.05$   
7 4 in the univariate analysis were further analyzed by multiple logistic regression. A  $p$ -value  $<$   
8 5 0.05 was considered statistically significant.  
9 6

### 7 3. Results

#### 8 Baseline Characteristics

9 A total of 2,476 students completed the online survey. Demographic data and  
10 electronic device usage before the pandemic is shown in Table 1. The participants' mean  
11 age was  $15.52 \pm 1.66$  years with a female predominance (64.9%). The majority of students  
12 were in grades 10-12 (68%), and around 40% used glasses or contact lenses to correct their  
13 refractive errors. Mobile phones were the most used digital device before the COVID-19  
14 pandemic at 54.2%, and a quarter of the students had around 5-6 hours of screen time  
15 before the lockdown. (Table 2)

#### 16 Digital Device Usage During the COVID-19 pandemic

17 The mean number of hours spent per day using digital devices before and after the  
18 pandemic were  $6.13 \pm 2.8$  and  $10.53 \pm 2.99$ , respectively ( $p < 0.001$ ). (Table 2) Over 60% of the  
19 students spend at least 7 hours/day with online learning (mean =  $7.03 \pm 2.06$  hours/day), and  
20 40% of them used multiple devices when learning online, with mobile phones being the most  
21 used. The majority of students did their online studying in a fan-ventilated environment, and  
22 over 80% employed some sort of protective equipment, including blue-coated glasses or  
23 protective films on their digital devices. Symptoms of back pain and neck pain were present  
24 in around 75.9% and 68.1% of students respectively during lockdown. (Table 3)

#### 25 Computer Vision Syndrome Questionnaire

26 The median CVS-Q score was 11 (range 0-64), and 70.1% of participants had CVS.  
27 Increasing severity of the condition was correlated with the number of hours of online  
28 learning and total hours of digital device usage ( $P < 0.001$ ). (Figure 1)

1  
2  
3  
4 1 The most common symptoms from CVS-Q were headaches (n=1921, 77.58%), burning  
5 2 (n=1791, 72.33%) and eye pain (n=1767, 71.37%). In terms of severity, headaches were the  
6  
7 3 most severe symptom (n=392, 15.83%) followed by worsening of eyesight (n=266, 10.74%),  
8  
9 4 and pain (n=256, 10.34%). (Figure 2)

#### 10 11 5 Associated Factors

12  
13 6 Univariate analysis revealed multiple factors associated with CVS, including female  
14  
15 7 gender ( $P \leq 0.001$ ) and device usage without additional protection (blue-coated glasses, blue-  
16  
17 8 coated film, or both) ( $P=0.006$ ). Students who did their online studying with fans had a higher  
18  
19 9 risk of developing CVS in comparison with students who studied in an air-conditioned  
20  
21 10 environment ( $P < 0.001$ ), and those who preferred using laptop computers had the greatest  
22  
23 11 risk of developing CVS (OR=2.36, 95%CI: 1.75-3.19,  $P < 0.001$ ). (Table 3)

24  
25 12 Multiple logistic regression analysis showed that the significant factors associated  
26  
27 13 with CVS were age  $\leq 15$  years (AOR=2.17, 95%CI: 1.36-3.45,  $P=0.01$ ), digital device usage  $> 6$   
28  
29 14 hours/day (AOR=1.91, 95%CI: 1.13-3.23,  $P=0.016$ ), online learning  $> 5$  hours/day (AOR=4.99,  
30  
31 15 95%CI: 3.08-8.12,  $P < 0.001$ ), multiple digital device usage for online learning (AOR=2.15,  
32  
33 16 95%CI: 1.04-4.43,  $P=0.038$ ), refractive errors (AOR=2.89, 95%CI: 1.83-4.54,  $P < 0.001$ ),  
34  
35 17 presence of back pain (AOR=2.06, 95%CI: 1.32-3.22,  $P=0.001$ ), and presence of neck pain  
36  
37 18 (AOR=2.36, 95%CI: 1.89-3.70,  $P < 0.001$ ). Myopia and emmetropia were independent risk  
38  
39 19 factors (AOR=2.11, 95%CI: 1.24-3.32 and AOR=2.09, 95%CI: 2.14-3.47 respectively,  $P < 0.001$ ).  
40  
41 20

#### 42 43 21 **4. Discussion**

44  
45 22 During the COVID-19 pandemic, a lockdown strategy was used to control the spread  
46  
47 23 of the disease, so schools were closed and online learning replaced the normal classroom  
48  
49 24 environment. Digital device usage during this period increased by over 4 hours per day, with  
50  
51 25 a mean of 7 hours per day of online learning. The prevalence of CVS in Thai students was  
52  
53 26 70.1%, and its severity correlated with the number of hours of digital device usage and the  
54  
55 27 number hours of online learning. The most common symptoms of CVS were headaches  
56  
57 28 (77.58%), burning (72.33%), and eye pain (71.37%). Multiple digital device usage during online  
58  
59  
60

1  
2  
3 1 learning, refractive error, and the presence of neck and back pain, were also independent  
4  
5 2 associated factors of CVS.  
6

7  
8 3 Increased online learning has been reported in all levels of education. (23, 24)  
9  
10 4 Students previously used digital devices as homework aids and for reading textbooks, but  
11  
12 5 after school closures, they were used for online classes as well, adding to the number of hours  
13  
14 6 of screen time per day. The increase in hours spent on digital devices was mostly for  
15  
16 7 educational purposes. (25) During virtual learning due to the COVID-19 pandemic, 50% of  
17  
18 8 students in India had CVS, while 77% of students in China reported having at least one of its  
19  
20 9 symptoms. (25-27)

21  
22 10 Among those with CVS, the severity was significantly correlated with the number of  
23  
24 11 hours of screen time, with the use of electronic devices for over 5 hours found to be  
25  
26 12 associated with it. (22) The use of mobile touch screen devices was related to the  
27  
28 13 development of musculoskeletal symptoms. (28) The most common symptom of CVS in our  
29  
30 14 study was headaches, in line with the findings of many other published reports. (22, 27, 29)

31  
32 15 Students under 15 were twice as likely to have CVS as their older counterparts, with  
33  
34 16 the higher severity occurring in younger students. Prevalence of CVS was found to be lower  
35  
36 17 in older Spanish university students than in the younger group. (29) In contrast, a Chinese  
37  
38 18 study found that CVS was independently associated with older age. (26) These apparent  
39  
40 19 anomalies may be attributed to variations in the mean age of students who have diverse  
41  
42 20 levels of digital devices use. The number of hours of digital device usage varied across grades.  
43  
44 21 (30) Another possible explanation for diverse correlations with age may be the developmental  
45  
46 22 differences in age groups, as younger students might have had problems answering some  
47  
48 23 parts of the questionnaire. A previous study found that children and adolescents aged 6-17  
49  
50 24 years were unable to report symptoms of dry eye correctly. (31)

51  
52 25 Multiple digital device usage was another independent associated factor of CVS.  
53  
54 26 Each type of device has its own recommended viewing distance. For computers, the reading  
55  
56 27 and writing distance is usually 30-40 cm from the eyes, and less eyestrain was found when  
57  
58 28 the computer monitor was 50-70 cm from the eyes. (32) Mobile phones and tablets, which  
59  
60 29 have smaller screens, are usually held closer, at about 20-30 cm from the eyes. (33) Half of  
30  
the students in this study reported their reading distance as between 40-80 cm, which is the



1 appropriate distance for computers. Only 30% and 38.9% of students respectively used  
2 laptop and desktop computers, while about half used multiple devices. When alternating  
3 between devices, students may not adjust the viewing distance appropriately, and this could  
4 lead to symptoms of CVS. Laptop computers, tablets, and smartphones are typically held in  
5 downward gaze, and greater corneal exposure from higher gaze angles results in increased  
6 tear evaporation. Variations in gaze position when alternating between devices can lead to  
7 CVS. (19)

8 Just as different types of digital devices require different viewing positions, they also  
9 involve variations in posturing, and improper ergonomics can lead to neck and back pain,  
10 which were independent risk factors in our study, in agreement with the findings of earlier  
11 reports. (22, 34, 35) A previous study found that a pattern of using smartphones or tablets in  
12 bouts of one hour or more carried a higher risk of musculoskeletal symptoms than the total  
13 duration of use throughout the day. (28) Some students have reported lying on the bed while  
14 studying. (10)

15 Having refractive error, particularly myopia, adds to the risk of developing CVS. Similar  
16 results were found in research in China which concluded that self-reported myopic students,  
17 both who did and did not wear glasses, were at higher risk of CVS compared to those who  
18 were not myopic. (26) Children with myopia could possibly have residual near-work induced  
19 transient myopia from impaired sympathetic function, eventually leading to permanent  
20 myopic progression. (36) Long hours of online studying might lead to myopic progression,  
21 causing children to wear under-corrected lenses, and residual refractive errors combined with  
22 continued near-work studying has been found to lead to CVS.

23 Myopic and hyperopic students in our study were those who reported wearing myopic  
24 or hyperopic corrective lenses for their refractive errors; those classified as emmetropic  
25 (28.8%) reported not using corrective lenses because our questionnaire asked whether  
26 students wore glasses or contact lenses for short- or long-sightedness, not whether they had  
27 refractive errors. Around 40% of students reportedly never had eye examinations, while 20%  
28 receive one every 2 years. Students with some uncorrected refractive errors could be hidden  
29 in this group, which may be the reason why emmetropia was a significant risk factor for  
30 developing CVS. People with uncorrected refractive errors have been found to be at a higher  
31 risk than those with corrected refractive errors and those without refractive errors. (26)

1  
2  
3 1 Prolonged exposure to computers in CVS patients has been reported to significantly  
4 2 correlate with dry eye disease.(37) Environmental factors producing corneal drying include  
5 3 low ambient humidity, high forced-air heating or air conditioning settings, together with the  
6 4 use of ventilation fans, excess static electricity, or airborne contaminants. (38) A study among  
7 5 information technology professionals in Egypt found that exposure to air pollution, use of air  
8 6 conditioners, and exposure to windy environments, were significant predictors of CVS. (39)  
9 7 Symptoms of dry eye are major components of CVS; (40) therefore, identifying environmental  
10 8 factors related to dry eye is necessary to make adjustments to minimize the condition.

11 9 This study provides comprehensive data on CVS during the COVID-19 pandemic from  
12 10 high school students using a validated questionnaire. Not only students, but also parents,  
13 11 teachers, and schools could benefit from using this study in terms of developing appropriate  
14 12 guidelines for online learning. Timetables should be adjusted to have appropriate durations  
15 13 and breaks. The overall digital device usage should be under 6 hours/day, and online learning  
16 14 should be limited to 5 hours/day, especially in younger students. This study emphasizes the  
17 15 need for regular eye examinations for students, especially those with refractive errors, which  
18 16 should be fully corrected. Proper ergonomics and learning environments are also important;  
19 17 students should adjust posturing and viewing distance according to the digital device used.

20 18 The main limitation of our study is that it used a self-reported questionnaire which is  
21 19 subject to bias. Due to the cross-sectional nature of this research, we were only able to  
22 20 identify factors associated with CVS, which has been defined by a mixture of symptoms and  
23 21 signs resulting in various definitions being used across clinical research, thereby limiting the  
24 22 available reports that could be compared with our results. The participants in this study were  
25 23 from a single city, so that it does not represent the online schooling situation in all of Thailand.  
26 24 Lastly, we did not have students perform the CVS-Q before the pandemic, so we do not have  
27 25 data for comparison of CVS before and during lockdown.

28 26 Further evaluations with objective methods such as tear break-up time, Schirmer test,  
29 27 and ocular surface staining could be added into the analysis. A possible pattern of online  
30 28 learning and its association with CVS could be investigated in a study of longer duration.

## 1 5. Conclusion

2 During the pandemic, students have spent an increasing number of hours on digital  
3 devices, and over 70% have CVS, with headaches being the most frequent symptom. The  
4 number of hours spent on digital devices and online learning, refractive errors, multiple digital  
5 device usage, presence of back pain, presence of neck pain, and younger age are factors  
6 associated with CVS.

7 Online learning had already grown over the years before the COVID-19 pandemic, but  
8 it has expanded exponentially during times of social distancing. We believe that even after  
9 this pandemic, online learning will remain, along with CVS. Our study points out factors  
10 associated with this condition which we hope will be taken into consideration in remodeling  
11 our education system appropriately.

## 12 Acknowledgments

13  
14 We would like to acknowledge the assistance of Miss Benyapa Dechanupat, Mr. Aphiphu  
15 Ruamthanthong, Miss Warisara Wattanasiripong, and Miss Alisha Kewkacha, who helped  
16 distribute this survey.

## 17 Authors' contributions

18 Conceptualization: KS, TT; Data collection: KS, WS, NY; Methodology: KS, WT, NS, PS, TT;  
19 Statistical analysis: KS, NS, TT ; Writing-original draft: KS, WT, NS, PS, NY, TT; Writing-  
20 review&editing: KS, WT, WS, NS, PS, NY, TT

## 21 Funding statement

22 This research received no specific grant from any funding agency in the public, commercial or  
23 not-for-profit sectors

## 24 A competing interests statement

25 There are no competing interests

## 26 Patient and public involvement

27 Patients and/or the public were not involved in the design, conduct, reporting, or  
28 dissemination of this research

1  
2  
3 1 **Patient consent form**  
4

5 2 Not applicable  
6  
7 3  
8  
9

10 4 **Ethics approval**  
11

12 5 The protocol of this study was approved by the Ethics Committee of Rajavithi Hospital  
13 (Number 64237)  
14  
15

16 7  
17  
18 8 **Data availability statement**  
19

20 9 The datasets used and/or analyzed during the current study are available from the  
21 corresponding author on reasonable request  
22  
23  
24  
25 11

26  
27 12 **Reference**  
28

- 29  
30 13 1. Liu YC, Kuo RL, Shih SR. COVID-19: The first documented coronavirus pandemic in  
31 history. *Biomed J.* 2020;43(4):328-33.  
32  
33 14 2. Huang C, Wang Y, Li X, Ren L, Zhao J, Hu Y, et al. Clinical features of patients infected  
34 with 2019 novel coronavirus in Wuhan, China. *Lancet.* 2020;395(10223):497-506.  
35  
36 15 3. Xiao X, Newman C, Buesching CD, Macdonald DW, Zhou Z-M. Animal sales from  
37 Wuhan wet markets immediately prior to the COVID-19 pandemic. *Scientific reports.*  
38 2021;11(1):11898.  
39  
40 16 4. A World Health Organization. WHO Director-General's opening remarks at the media  
41 briefing on COVID-19-11 March 2020. Available at: <https://www.who.int/director-general/speeches/detail/who-director-general-s-opening-remarks-at-the-media-briefing-on-covid-19--11-march-2020>. Accessed December 29, 2021.  
42  
43 17 5. Ferguson N, Laydon D, Nedjati-Gilani G, Imai N, Ainslie K, Baguelin M, et al. Report 9:  
44 Impact of non-pharmaceutical interventions (NPIs) to reduce COVID-19 mortality and  
45 healthcare demand2020.  
46  
47 18 6. Eubank S, Eckstrand I, Lewis B, Venkatramanan S, Marathe M, Barrett CL.  
48  
49  
50  
51  
52  
53  
54  
55  
56  
57  
58  
59  
60

- 1 Reduce COVID-19 Mortality and Healthcare Demand". *Bulletin of mathematical biology.* 2020;82(4):52.
- 2
- 3 7. United Nations Educational, Scientific and Cultural Organization Institute for statistics  
4 : School closures and regional policies to mitigate learning loss due to COVID-19: a focus on  
5 the Asia-Pacific. Montreal, Quebec, Canada 2021.
- 6 8. The Economic Times. COVID-19 Impact : Screen time up by 100% for children.  
7 Available at: [https://economictimes.indiatimes.com/industry/services/education/covid-19-](https://economictimes.indiatimes.com/industry/services/education/covid-19-impact-screen-time-up-by-100-for-children/articleshow/76383951.cms?from=mdr)  
8 [impact-screen-time-up-by-100-for-children/articleshow/76383951.cms?from=mdr.](https://economictimes.indiatimes.com/industry/services/education/covid-19-impact-screen-time-up-by-100-for-children/articleshow/76383951.cms?from=mdr)  
9 Accessed December 29, 2021.
- 10 9. Twenge JM, Campbell WK. Associations between screen time and lower  
11 psychological well-being among children and adolescents: Evidence from a population-  
12 based study. *Preventive Medicine Reports.* 2018;12:271-83.
- 13 10. Ichhpujani P, Singh RB, Foulsham W, Thakur S, Lamba AS. Visual implications of  
14 digital device usage in school children: a cross-sectional study. *BMC Ophthalmol.*  
15 2019;19(1):76.
- 16 11. Daum KM, Clore KA, Simms SS, Vesely JW, Wilczek DD, Spittle BM, et al. Productivity  
17 associated with visual status of computer users. *Optometry (St Louis, Mo).* 2004;75(1):33-  
18 47.
- 19 12. González-Pérez M, Susi R, Antona B, Barrio A, González E. The Computer-Vision  
20 Symptom Scale (CVSS17): development and initial validation. *Invest Ophthalmol Vis Sci.*  
21 2014;55(7):4504-11.
- 22 13. Benedetto S, Draï-Zerbib V, Pedrotti M, Tissier G, Baccino T. E-readers and visual  
23 fatigue. *PLoS One.* 2013;8(12):e83676.
- 24 14. Seguí Mdel M, Cabrero-García J, Crespo A, Verdú J, Ronda E. A reliable and valid  
25 questionnaire was developed to measure computer vision syndrome at the workplace. *J Clin*  
26 *Epidemiol.* 2015;68(6):662-73.
- 27 15. Logaraj M, Madhupriya V, Hegde S. Computer vision syndrome and associated  
28 factors among medical and engineering students in chennai. *Annals of medical and health*  
29 *sciences research.* 2014;4(2):179-85.
- 30 16. Loebis R, Subakti Zulkarnain B, Zahra N. Correlation between the exposure time to  
31 mobile devices and the prevalence of evaporative dry eyes as one of the symptoms of

- 1  
2  
3 1 computer vision syndrome among Senior High School students in East Java, Indonesia. J  
4 Basic Clin Physiol Pharmacol. 2021;32(4):541-5.  
5  
6  
7 3 17. American Academy of Child & Adolescent Psychiatry. Screen Time and Children.  
8 Available at: [https://www.aacap.org/AACAP/Families\\_and\\_Youth/Facts\\_for\\_Families/FFF-Guide/Children-And-Watching-TV054.aspx#:text=On%20average%2C%20children%20ages%208,use%20may%20lead%20to%20problems](https://www.aacap.org/AACAP/Families_and_Youth/Facts_for_Families/FFF-Guide/Children-And-Watching-TV054.aspx#:text=On%20average%2C%20children%20ages%208,use%20may%20lead%20to%20problems). Accessed April 8, 2022.  
9  
10  
11  
12  
13  
14  
15  
16 8 18. Lavin W, Taptagaporn S, Khruakhorn S, Kanchanaranya N. Prevalence and associated  
17 risk factors of digital eye strain among children in secondary schools in Pathumthani  
18 Province, Thailand. Journal of the Medical Association of Thailand. 2018;101:957-63.  
19  
20  
21  
22 11 19. Rosenfield M. Computer vision syndrome: a review of ocular causes and potential  
23 treatments. Ophthalmic Physiol Opt. 2011;31(5):502-15.  
24  
25  
26 13 20. Iyer JV, Lee SY, Tong L. The dry eye disease activity log study. ScientificWorldJournal.  
27 2012;2012:589875.  
28  
29 15 21. Blehm C, Vishnu S, Khattak A, Mitra S, Yee RW. Computer vision syndrome: a review.  
30 Surv Ophthalmol. 2005;50(3):253-62.  
31  
32  
33 17 22. Al Tawil L, Aldokhayel S, Zeitouni L, Qadoumi T, Hussein S, Ahamed SS. Prevalence of  
34 self-reported computer vision syndrome symptoms and its associated factors among  
35 university students. Eur J Ophthalmol. 2020;30(1):189-95.  
36  
37  
38 20 23. Parajuli BR, Koirala S, Bajracharya A. Computer vision syndrome: a rising problem  
39 during COVID-19 period amongst students and online workers. Journal of Patan Academy of  
40 Health Sciences. 2021;8(2):6-9.  
41  
42  
43 23 24. Wang L, Wei X, Deng Y. Computer Vision Syndrome During SARS-CoV-2 Outbreak in  
44 University Students: A Comparison Between Online Courses and Classroom Lectures.  
45 Frontiers in public health. 2021;9:696036.  
46  
47  
48 26 25. Ganne P, Najeeb S, Chaitanya G, Sharma A, Krishnappa NC. Digital Eye Strain  
49 Epidemic amid COVID-19 Pandemic - A Cross-sectional Survey. Ophthalmic epidemiology.  
50 2021;28(4):285-92.  
51  
52  
53 29 26. Li R, Ying B, Qian Y, Chen D, Li X, Zhu H, et al. Prevalence of Self-Reported Symptoms  
54 of Computer Vision Syndrome and Associated Risk Factors among School Students in China  
55 during the COVID-19 Pandemic. Ophthalmic Epidemiol. 2021:1-11.  
56  
57  
58  
59  
60

- 1  
2  
3 1 27. Mohan A, Sen P, Shah C, Jain E, Jain S. Prevalence and risk factor assessment of  
4 2 digital eye strain among children using online e-learning during the COVID-19 pandemic:  
5 3 Digital eye strain among kids (DESK study-1). *Indian journal of ophthalmology*.  
6 4 2021;69(1):140-4.  
7  
8  
9 5 28. Toh SH, Coenen P, Howie EK, Smith AJ, Mukherjee S, Mackey DA, et al. A prospective  
10 6 longitudinal study of mobile touch screen device use and musculoskeletal symptoms and  
11 7 visual health in adolescents. *Applied ergonomics*. 2020;85:103028.  
12  
13 8 29. Cantó-Sancho N, Sánchez-Brau M, Ivorra-Soler B, Seguí-Crespo M. Computer vision  
14 9 syndrome prevalence according to individual and video display terminal exposure  
15 10 characteristics in Spanish university students. *International journal of clinical practice*.  
16 11 2021;75(3):e13681.  
17  
18 12 30. Straker L, Harris C, Joosten J, Howie EK. Mobile technology dominates school  
19 13 children's IT use in an advantaged school community and is associated with musculoskeletal  
20 14 and visual symptoms. *Ergonomics*. 2018;61(5):658-69.  
21  
22 15 31. Hu L, Yan Z, Ye T, Lu F, Xu P, Chen H. Differences in children and adolescents' ability  
23 16 of reporting two CVS-related visual problems. *Ergonomics*. 2013;56(10):1546-57.  
24  
25 17 32. Rempel D, Willms K, Anshel J, Jaschinski W, Sheedy J. The effects of visual display  
26 18 distance on eye accommodation, head posture, and vision and neck symptoms. *Human*  
27 19 *factors*. 2007;49(5):830-8.  
28  
29 20 33. Long J, Cheung R, Duong S, Paynter R, Asper L. Viewing distance and eyestrain  
30 21 symptoms with prolonged viewing of smartphones. *Clinical & experimental optometry*.  
31 22 2017;100(2):133-7.  
32  
33 23 34. Teo C, Giffard P, Johnston V, Treleaven J. Computer vision symptoms in people with  
34 24 and without neck pain. *Applied ergonomics*. 2019;80:50-6.  
35  
36 25 35. Sen A, Richardson S. A study of computer-related upper limb discomfort and  
37 26 computer vision syndrome. *Journal of human ergology*. 2007;36(2):45-50.  
38  
39 27 36. Vasudevan B, Ciuffreda KJ, Gilmartin B. Sympathetic Inhibition of Accommodation  
40 28 after Sustained Nearwork in Subjects with Myopia and Emmetropia. *Investigative*  
41 29 *Ophthalmology & Visual Science*. 2009;50(1):114-20.  
42  
43 30 37. Sánchez-Valerio M, Mohamed-Noriega K, Zamora-Ginez I, Baez Duarte B, Vallejo-Ruiz  
44 31 V. Dry Eye Disease Association with Computer Exposure Time Among Subjects with  
45 32 Computer Vision Syndrome. *Clinical Ophthalmology*. 2020;Volume 14:4311-7.

1  
2  
3  
4  
5  
6  
7  
8  
9  
10  
11  
12  
13  
14  
15  
16  
17  
18  
19  
20  
21  
22  
23  
24  
25  
26  
27  
28  
29  
30  
31  
32  
33  
34  
35  
36  
37  
38  
39  
40  
41  
42  
43  
44  
45  
46  
47  
48  
49  
50  
51  
52  
53  
54  
55  
56  
57  
58  
59  
60

1 38. Calonge M, Pinto-Fraga J, González-García MJ, Enríquez-de-Salamanca A, López-de la  
2 Rosa A, Fernández I, et al. Effects of the External Environment on Dry Eye Disease. *Int*  
3 *Ophthalmol Clin.* 2017;57(2):23-40.  
4 39. Zayed HAM, Saied SM, Younis EA, Atlam SA. Digital eye strain: prevalence and  
5 associated factors among information technology professionals, Egypt. *Environ Sci Pollut*  
6 *Res Int.* 2021;28(20):25187-95.  
7 40. Mehra D, Galor A. Digital Screen Use and Dry Eye: A Review. *Asia Pac J Ophthalmol*  
8 *(Phila).* 2020;9(6):491-7.

Confidential: For Review Only



**Table 1** Demographic characteristics of participants and usage of electronic devices before the pandemic (N=2,476)

| <b>Demographic characteristics</b>                    | <b>N (%)</b>               |
|-------------------------------------------------------|----------------------------|
| Mean age (years) ± SD                                 | 15.52 ± 1.66 (range 10-19) |
| Female                                                | 1,606 (64.9%)              |
| <b>Grade</b>                                          |                            |
| Grade 4-6                                             | 11 (0.4%)                  |
| Grade 7-9                                             | 781 (31.6%)                |
| Grade 10-12                                           | 1684 (68%)                 |
| <b>Refractive status</b>                              |                            |
| Emmetropia                                            | 1180 (47.7%)               |
| Myopia                                                | 1055 (42.6%)               |
| Hyperopia                                             | 241 (9.7%)                 |
| <b>Glasses and Contact lens use</b>                   |                            |
| None                                                  | 1180 (47.7%)               |
| Glasses for myopia                                    | 784 (31.7%)                |
| Glasses for hyperopia                                 | 186 (7.5%)                 |
| CL for myopia                                         | 151 (6.1%)                 |
| CL for hyperopia                                      | 47 (1.9%)                  |
| Glasses and CL for myopia                             | 120 (4.8%)                 |
| Glasses and CL for hyperopia                          | 8 (0.3%)                   |
| <b>Most commonly-used digital devices (pre-covid)</b> |                            |
| Mobile phone                                          | 1341 (54.2%)               |
| Tablet                                                | 454 (18.3%)                |
| Computer desktop                                      | 436 (17.6%)                |
| Computer Laptop                                       | 216 (8.7%)                 |
| Television                                            | 29 (1.2%)                  |
| <b>Frequency of eye check-up</b>                      |                            |
| None                                                  | 1054 (42.6%)               |
| Once every 2 years                                    | 504 (20.4%)                |
| Once a year                                           | 715 (28.9%)                |
| Twice a year                                          | 203 (8.2%)                 |

**Table 2** Comparison between duration of digital device usage per day before and during COVID-19 lockdown.(N=2,476)

| Duration of digital device usage per day         | Before COVID-19   | During COVID-19     |
|--------------------------------------------------|-------------------|---------------------|
| ≤ 2h                                             | 201 (8.1%)        | 67 (2.7%)           |
| 3-4 h                                            | 596 (24.1%)       | 271 (21.9%)         |
| 5-6 h                                            | 648 (26.2%)       | 502 (20.3%)         |
| 7-8 h                                            | 492 (19.9%)       | 1109 (44.8%)        |
| 9-10 h                                           | 401 (16.2%)       | 480 (19.4%)         |
| 11-12 h                                          | 49 (1.9%)         | 16 (0.7%)           |
| > 12 h                                           | 89 (3.6%)         | 31 (1.3%)           |
| <b>Number of hours spent per day (mean ± SD)</b> | <b>6.13 ± 2.8</b> | <b>10.53 ± 2.99</b> |

1 **Table 3** The usage of electronic devices in online learning during covid-19 lockdown (N=2,476)

| Demographic characteristics                                         | N (%)        |
|---------------------------------------------------------------------|--------------|
| <b>Total hours of online learning</b>                               |              |
| ≤ 2h                                                                | 67 (2.7%)    |
| 3-4 h                                                               | 271 (11%)    |
| 5-6 h                                                               | 502 (20.3%)  |
| 7-8 h                                                               | 1109 (44.8%) |
| 9-10 h                                                              | 480 (19.4%)  |
| > 10 h                                                              | 47 (1.8%)    |
| <b>Device used for online learning</b>                              |              |
| Single device                                                       | 1486 (60%)   |
| Multiple device                                                     | 990 (40%)    |
| Mobile phone                                                        | 1174 (47.4%) |
| Tablet                                                              | 1095 (44.2%) |
| Computer desktop                                                    | 965 (39%)    |
| Computer Laptop                                                     | 691 (27.9%)  |
| Television                                                          | 27 (1.1%)    |
| <b>Environment</b>                                                  |              |
| Fan                                                                 | 1272 (51.4%) |
| Air-conditioning                                                    | 1203 (48.6%) |
| <b>Protective instrument</b>                                        |              |
| None                                                                | 413 (16.7%)  |
| Blue-coated glasses                                                 | 1172 (47.3%) |
| Blue coated film on digital devices                                 | 680 (27.5%)  |
| Both blue-coated glasses and film on digital device                 | 211 (8.5%)   |
| <b>Frequency of eye rest</b>                                        |              |
| Never                                                               | 371 (15%)    |
| Every 15 minutes                                                    | 596 (24.1%)  |
| Every 30 minutes                                                    | 431 (17.4%)  |
| Every 45 minutes                                                    | 304 (12.3%)  |
| Every 1 hours                                                       | 427 (17.2%)  |
| Every ≥ 1 hour                                                      | 347 (14%)    |
| <b>Distance of digital devices from eyes during online learning</b> |              |
| < 40 cm                                                             | 943 (38.1%)  |
| 40-80 cm                                                            | 1260 (50.9%) |
| > 80 cm                                                             | 273 (11%)    |
| <b>Back pain</b>                                                    | 1880 (75.9%) |
| <b>Neck pain</b>                                                    | 1687 (68.1%) |
| <b>Activity when resting</b>                                        |              |
| Close eyes                                                          | 1144 (46.2%) |
| Sleep                                                               | 1230 (49.7%) |
| Look out                                                            | 822 (33.2%)  |
| Play games                                                          | 568 (22.9%)  |
| Use artificial tears                                                | 271 (10.9%)  |

2

3

4

5

1 **Table 4** Multiple logistic regression showing the associated risk factors of CVS

| Factor                           | Univariate analysis |            |         | Multiple analysis |           |         |
|----------------------------------|---------------------|------------|---------|-------------------|-----------|---------|
|                                  | Crude OR            | 95%CI      | P-value | Adjusted OR       | 95%CI     | P-value |
| Age ≤ 15                         | 2.34                | 1.63-3.36  | <0.001  | 2.17              | 1.36-3.45 | 0.010   |
| Female                           | 1.73                | 1.34-2.23  | <0.001  | 1.26              | 0.90-1.75 | 0.178   |
| Overall digital usage > 6 hr     | 7.41                | 5.52-9.96  | <0.001  | 1.91              | 1.13-3.23 | 0.016   |
| Online learning > 5 hr           | 7.99                | 6.07-10.53 | <0.001  | 4.99              | 3.08-8.12 | <0.001  |
| Refractive error                 | 1.35                | 1.02-1.79  | 0.035   | 2.89              | 1.83-4.54 | <0.001  |
| <b>Refractive error</b>          |                     |            |         |                   |           |         |
| Myopia                           | 3.21                | 2.31-4.44  | <0.001  | 2.11              | 1.24-3.32 | <0.001  |
| Emmetropia                       | 3.19                | 2.21-4.60  | <0.001  | 2.09              | 2.14-3.47 | <0.001  |
| Hyperopia                        | Ref                 |            |         | Ref               |           |         |
| Fan                              | 2.55                | 1.86-3.48  | <0.001  | 1.20              | 0.81-1.81 | 0.362   |
| Non-Protective device used       | 1.82                | 1.19-2.79  | 0.006   | 1.07              | 0.66-1.73 | 0.793   |
| <b>Protective device</b>         |                     |            |         |                   |           |         |
| Both                             | 4.62                | 2.90-7.38  | <0.001  | 0.66              | 0.39-1.11 | 0.118   |
| Blue-coated glasses              | 3.36                | 2.52-4.49  | <0.001  | 1.19              | 0.71-1.99 | 0.508   |
| Blue-coated film                 | Ref                 |            |         | Ref               |           |         |
| Rest of over 45 mins             | 2.59                | 2.01-3.34  | <0.001  | 1.02              | 0.7-1.48  | 0.935   |
| Other digital device used > 2 hr | 2.22                | 1.73-2.85  | <0.001  | 0.89              | 0.61-1.28 | 0.520   |
| Distance from device < 40 cm     | 2.42                | 1.78-3.30  | <0.001  | 1.07              | 0.71-1.63 | 0.743   |
| Back pain                        | 2.84                | 2.12-3.80  | <0.001  | 2.06              | 1.32-3.22 | 0.001   |
| Neck pain                        | 2.59                | 1.94-3.46  | <0.001  | 2.64              | 1.89-3.70 | <0.001  |
| Multiple digital devices used    | 3.60                | 2.76-4.70  | <0.001  | 2.15              | 1.04-4.43 | 0.038   |
| Non-use of artificial tears      | 0.96                | 0.70-1.30  | 0.77    | 1.34              | 0.91-1.98 | 0.133   |
| Close eye during online learning | 1.69                | 1.32-2.17  | <0.001  | 1.12              | 0.80-1.55 | 0.508   |
| Sleep during online learning     | 2.12                | 1.64-2.74  | <0.001  | 1.29              | 0.93-1.79 | 0.135   |
| Laptop computers preference      | 2.36                | 1.75-3.19  | <0.001  | 0.83              | 0.48-1.42 | 0.494   |
| Tablet preference                | 2.27                | 1.77-2.92  | <0.001  | 0.86              | 0.51-1.45 | 0.568   |
| Television screen preference     | 1.49                | 0.49-4.55  | 0.49    | 1.067             | 0.30-3.75 | 0.920   |
| Computer desktop preference      | 1.37                | 1.07-1.77  | 0.016   | 1.00              | 0.61-1.66 | 0.987   |
| Mobile phone preference          | 1.34                | 1.03-1.69  | 0.031   | 0.81              | 0.50-1.31 | 0.395   |

2

3

4

5

6

7

**Figure 1** The mean number of hours per day of online learning and total hours per day of digital device usage according to CVS severity.

**INCIDENCE OF COMPUTER VISION SYNDROME**

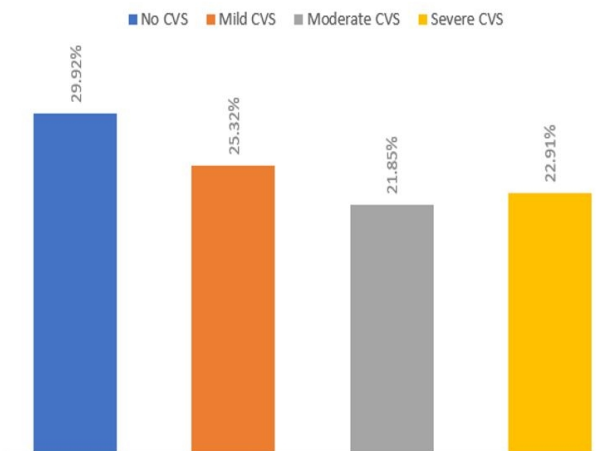

|                                                               | No CVS<br>(n=741) | Mild CVS<br>(n=627) | Moderate CVS<br>(n=541) | Severe CVS<br>(n=567) | P-Value |
|---------------------------------------------------------------|-------------------|---------------------|-------------------------|-----------------------|---------|
| Mean number of hours per day of online learning (hours) ± SD  | 6.16 ± 2.26       | 7.23 ± 2.01         | 7.28 ± 1.78             | 7.69 ± 1.74           | < 0.001 |
| Mean hours per day of total digital device usage (hours) ± SD | 9.45 ± 3.38       | 10.77 ± 2.93        | 10.89 ± 2.57            | 11.33 ± 2.54          | < 0.001 |

101x91mm (300 x 300 DPI)

1  
2  
3  
4  
5  
6  
7  
8  
9  
10  
11  
12  
13  
14  
15  
16  
17  
18  
19  
20  
21  
22  
23  
24  
25  
26  
27  
28  
29  
30  
31  
32  
33  
34  
35  
36  
37  
38  
39  
40  
41  
42  
43  
44  
45  
46  
47  
48  
49  
50  
51  
52  
53  
54  
55  
56  
57  
58  
59  
60

**Figure 2** The percentage of frequency and severity of different eye symptoms of CVS in student



128x91mm (300 x 300 DPI)

## Effects of digital devices and online learning on computer vision syndrome in students during the COVID-19 era

### Survey

The purpose of this survey: This survey aims to gather information from students of different year groups about what visual symptoms they experience and how well they protect their eyes during the period of online learning, since it is compulsory for students to sit in front of their screens for a long period of time. This results of this survey will then be analyzed, conclusion will be drawn and the results will then be incorporated as one of the research findings.

General overview of the survey:

First section of the survey - 8 questions

Second section of the survey - 8 questions

Third section of the survey - 18-36 questions

It will take approximately 2 minutes to fill out the survey!

Please note that the survey will be anonymous. The information will be kept confidential and will only be used for this research.

### **Informed consent**

1. Do you voluntarily agree to complete this survey?
  - I voluntarily agreed to complete this survey

### **Section 1 of the survey: General information**

1. Age  
\_\_\_\_\_
2. Gender
  - Male
  - Female
3. Grade level
  - Grade 1-3/Year 2-4
  - Grade 4-6/Year 5-7
  - Grade 7-9/Year 8-10
  - Grade 10-12/Year 11-13
4. Before the period of online learning, how many hours per day do you spend on average using electronic devices?
  - 0 hour
  - 1 hour
  - 2 hours
  - 3 hours
  - 4 hours
  - 5 hours
  - 6 hours
  - 7 hours

- 1  
2  
3  
4  
5  
6  
7  
8  
9  
10  
11  
12  
13  
14  
15  
16  
17  
18  
19  
20  
21  
22  
23  
24  
25  
26  
27  
28  
29  
30  
31  
32  
33  
34  
35
- 8 hours
  - 9 hours
  - 10 hours
  - 11 hours
  - 12 hours
  - Other.....
5. Before the period of online learning, what electronic devices did you use most often?
- Tablet (iPad)
  - Mobile Phone
  - Computer/Desktop
  - Laptop
  - Television
  - Other
6. Do you wear any of these? (Can tick more than one box)
- Glasses for short-sightedness
  - Glasses for long-sightedness
  - Contact lenses for short-sightedness
  - Contact lenses for long-sightedness
7. How often do you have an eye check-up?
- Never
  - Once every two years
  - Once a year
  - Twice a year
  - Other

## Section 2 of the Survey

- 36  
37  
38  
39  
40  
41  
42  
43  
44  
45  
46  
47  
48  
49  
50  
51  
52  
53  
54  
55  
56  
57  
58  
59  
60
7. What electronic devices do you use for online learning?
- Tablet (iPad)
  - Mobile Phone
  - Computer/Desktop
  - Laptop
  - Television
  - Other
8. How many hours per day do you spent learning online?
- 1 hour
  - 2 hours
  - 3 hours
  - 4 hours
  - 5 hours
  - 6 hours
  - 7 hours
  - 8 hours
  - 9 hours
  - 10 hours
  - 11 hours



- 1  
2  
3  
4  
5  
6  
7  
8  
9  
10  
11  
12  
13  
14  
15  
16  
17  
18  
19  
20  
21  
22  
23  
24  
25  
26  
27  
28  
29  
30  
31  
32  
33  
34  
35  
36  
37  
38  
39  
40  
41  
42  
43  
44  
45  
46  
47  
48  
49  
50  
51  
52  
53  
54  
55  
56  
57  
58  
59  
60
- 12 hours
  - Other.....
9. What is the environment of your room when you learn online? Do you use a fan or an air conditioner?
- Fan
  - Air conditioner
  - Other
10. Do you use any equipment to help protect your eyes?
- Glasses
  - Films for computer/tablets/phone screens
11. How often do you give your eyes a rest during online classes?
- Never
  - Every 15 minutes
  - Every 30 minutes
  - Every 45 minutes
  - Every 1 hour
  - Every 2 hours
  - Other
12. What do you do when you rest your eyes?
- Close your eyes
  - Look out of the window as far as you could
  - Play games on your device
  - Sleep
  - Artificial tear
  - Other
13. Apart from using electronic devices for online learning, how much time do you spend using electronic devices for other activities?
- 1 hour
  - 2 hours
  - 3 hours
  - 4 hours
  - 5 hours
  - 6 hours
  - 7 hours
  - 8 hours
  - 9 hours
  - 10 hours
  - 11 hours
  - 12 hours
  - Other.....
14. How far apart do you position your devices from your eyes?
- 20-40 cm
  - 40-60 cm
  - 60-80 cm
  - 80-100 cm
  - more than 100 cm

**Section 3 of the survey:**

This section will be the computer vision syndrome questionnaire.

The first question will be related to the frequency of the symptom, how often the symptom occurs:

Never = the symptom does not occur at all

Occasionally = Sporadic episodes or once a week

Often or always = 2 or 3 times a week or almost everyday

NOTE: If you have answered "Never" for the first question, you will not be asked about the intensity, but if you answered "Occasionally" or "Often or always", you will be required to answer the question about intensity.

The second question will be related to the intensity of the symptom. You are required to choose between "moderate" or "Intense" for each of the symptoms.

15. When you learn online, do you experience the symptom of eye burning?
  - Never (the symptom does not occur)
  - Occasionally (once a week)
  - Often or always (2 or 3 times a week or almost everyday)
16. What is the intensity of the symptom? (If you answered never, do not answer this question)
  - Moderate
  - Intense
17. When you learn online, do you experience the symptom of eye itching?
  - Never (the symptom does not occur)
  - Occasionally (once a week)
  - Often or always (2 or 3 times a week or almost everyday)
18. What is the intensity of the symptom? (If you answered never, do not answer this question)
  - Moderate
  - Intense
19. When you learn online, have you ever feel like there's foreign body in your eyes?
  - Never (the symptom does not occur)
  - Occasionally (once a week)
  - Often or always (2 or 3 times a week or almost everyday)
20. What is the intensity of the symptom? (If you answered never, do not answer this question)
  - Moderate
  - Intense
21. When you learn online, do you experience the symptom of tearing?
  - Never (the symptom does not occur)
  - Occasionally (once a week)
  - Often or always (2 or 3 times a week or almost everyday)
22. What is the intensity of the symptom? (If you answered never, do not answer this question)
  - Moderate

- 1  
2  
3  
4  
5  
6  
7  
8  
9  
10  
11  
12  
13  
14  
15  
16  
17  
18  
19  
20  
21  
22  
23  
24  
25  
26  
27  
28  
29  
30  
31  
32  
33  
34  
35  
36  
37  
38  
39  
40  
41  
42  
43  
44  
45  
46  
47  
48  
49  
50  
51  
52  
53  
54  
55  
56  
57  
58  
59  
60
- Intense
23. When you learn online, do you experience the symptom of excessive blinking?
- Never (the symptom does not occur)
  - Occasionally (once a week)
  - Often or always (2 or 3 times a week or almost everyday)
24. What is the intensity of the symptom? (If you answered never, do not answer this question)
- Moderate
  - Intense
25. When you learn online, do you experience the symptom of eye redness?
- Never (the symptom does not occur)
  - Occasionally (once a week)
  - Often or always (2 or 3 times a week or almost everyday)
26. What is the intensity of the symptom? (If you answered never, do not answer this question)
- Moderate
  - Intense
27. When you learn online, do you experience the symptom of eye pain?
- Never (the symptom does not occur)
  - Occasionally (once a week)
  - Often or always (2 or 3 times a week or almost everyday)
28. What is the intensity of the symptom? (If you answered never, do not answer this question)
- Moderate
  - Intense
29. When you learn online, do you experience the symptom of heavy eyelids?
- Never (the symptom does not occur)
  - Occasionally (once a week)
  - Often or always (2 or 3 times a week or almost everyday)
30. What is the intensity of the symptom? (If you answered never, do not answer this question)
- Moderate
  - Intense
31. When you learn online, do you experience the symptom of eye dryness?
- Never (the symptom does not occur)
  - Occasionally (once a week)
  - Often or always (2 or 3 times a week or almost everyday)
32. What is the intensity of the symptom? (If you answered never, do not answer this question)
- Moderate
  - Intense
33. When you learn online, do you experience the symptom of blurred vision?
- Never (the symptom does not occur)
  - Occasionally (once a week)
  - Often or always (2 or 3 times a week or almost everyday)
34. What is the intensity of the symptom? (If you answered never, do not answer this question)

- 1  
2  
3  
4  
5  
6  
7  
8  
9  
10  
11  
12  
13  
14  
15  
16  
17  
18  
19  
20  
21  
22  
23  
24  
25  
26  
27  
28  
29  
30  
31  
32  
33  
34  
35  
36  
37  
38  
39  
40  
41  
42  
43  
44  
45  
46  
47  
48  
49  
50  
51  
52  
53  
54  
55  
56  
57  
58  
59  
60
- Moderate
  - Intense
35. When you learn online, do you experience the symptom of double vision?
- Never (the symptom does not occur)
  - Occasionally (once a week)
  - Often or always (2 or 3 times a week or almost everyday)
36. What is the intensity of the symptom? (If you answered never, do not answer this question)
- Moderate
  - Intense
37. When you learn online, how often do you experience difficulties focusing near objects?
- Never (the symptom does not occur)
  - Occasionally (once a week)
  - Often or always (2 or 3 times a week or almost everyday)
38. What is the intensity of the symptom? (If you answered never, do not answer this question)
- Moderate
  - Intense
39. When you learn online, do you experience the symptom of increased sensitivity to light?
- Never (the symptom does not occur)
  - Occasionally (once a week)
  - Often or always (2 or 3 times a week or almost everyday)
40. What is the intensity of the symptom? (If you answered never, do not answer this question)
- Moderate
  - Intense
41. When you learn online, do you experience the symptom of colored halos around objects?
- Never (the symptom does not occur)
  - Occasionally (once a week)
  - Often or always (2 or 3 times a week or almost everyday)
42. What is the intensity of the symptom? (If you answered never, do not answer this question)
- Moderate
  - Intense
43. When you learn online, do you experience the feeling that sight is worsening?
- Never (the symptom does not occur)
  - Occasionally (once a week)
  - Often or always (2 or 3 times a week or almost everyday)
44. What is the intensity of the symptom? (If you answered never, do not answer this question)
- Moderate
  - Intense
45. When you learn online, how often do you have a headache?
- Never (the symptom does not occur)

- 1  
2  
3  
4  
5  
6  
7  
8  
9  
10  
11  
12  
13  
14  
15  
16  
17  
18  
19  
20  
21  
22  
23  
24  
25  
26  
27  
28  
29  
30  
31  
32  
33  
34  
35  
36  
37  
38  
39  
40  
41  
42  
43  
44  
45  
46  
47  
48  
49  
50  
51  
52  
53  
54  
55  
56  
57  
58  
59  
60
- Occasionally (once a week)
  - Often or always (2 or 3 times a week or almost everyday)
46. What is the intensity of the symptom? (If you answered never, do not answer this question)
- Moderate
  - Intense
47. When you learn online, how often do you experience back pain?
- Never (the symptom does not occur)
  - Occasionally (once a week)
  - Often or always (2 or 3 times a week or almost everyday)
48. What is the intensity of the symptom? (If you answered never, do not answer this question)
- Moderate
  - Intense
49. When you learn online, how often do you experience neck pain?
- Never (the symptom does not occur)
  - Occasionally (once a week)
  - Often or always (2 or 3 times a week or almost everyday)
50. What is the intensity of the symptom? (If you answered never, do not answer this question)
- Never (the symptom does not occur)
  - Occasionally (once a week)
  - Often or always (2 or 3 times a week or almost everyday)

Thank you for completing this survey!
